# Supplementary material for: Uncovering gamma-stable organic semiconductors: large-scale screening and predictive modelling for radiation-hard applications
Source: Royal Society of Chemistry journal article supplement (doi:10.1039/d5ee05453b), 2025-11-28
Supplement: d5ee05453b3.xlsx [file d5ee05453b3.xlsx]

## Sheet: descriptors
name	smiles	log10(AED90)	band_position (nm)	band_height	Ionization Penalty	Ionization Penalty Neutral	State Penalty	Charging Adjusted Penalty	Energy	Potential Energy-S-OPLS	Stretch Energy-S-OPLS	Bend Energy-S-OPLS	Torsional Energy-S-OPLS	Improper Torsional Energy-S-OPLS	Van der Waal Energy-S-OPLS	Electrostatic Energy-S-OPLS	RMS Derivative-S-OPLS	Jm	MW	AlogP	HBA	HBD	RB	PSA	Estate	MR	Polar	MOPAC Heat of Formation	Dipole	Dipole X	Dipole Y	Dipole Z	Ionization Energy	HOMO Energy	LUMO Energy	MOPAC Total Energy EV	mySASA	#stars	#rotor	#rtvFG	CNS	mol MW	dipole2	SASA	FOSA	FISA	PISA	WPSA	volume
A18B1	COC(C=C1)=CC=C1N(C2=CC=C(OC)C=C2)C3=CC=C(C4=C(F)C(F)=C(C5=C(F)C(F)=C(C6=CC=C(N(C7=CC=C(OC)C=C7)C8=CC=C(OC)C=C8)C=C6)C(F)=C5F)C(F)=C4F)C=C3	4.33746	372.512	0.11185	0	0	0	0	154.392	189.001	49.845	48.29	204.84	0.069	394.051	-508.095	0.046	0	904.84	14.629	4	0	13	43.4	178.008	235.372	116.028	-306.909	0.19	0.19	0.01	0.01	7.78205	-7.782	-1.361	-12148.3	1301.85	12	13	0	1	904.855	0	1317.39	372.172	0.011	699.265	245.943	2471.2
A21B1	COC(C=C1)=CC=C1N(C2=CC=C(OC)C=C2)C3=CC=C(C4=CC=C(C5=CC=C(N(C6=CC=C(OC)C=C6)C7=CC=C(OC)C=C7)C=C5)C8=NSN=C84)C=C3	4.55146	502	0.09315	0	0	0	0	133.62	55.355	43.177	49.016	190.554	0.052	341.227	-568.672	0.051	0	742.883	11.594	6	0	12	97.42	112.505	221.024	108.118	79.7382	3.63	3.47	-0.12	-1.08	7.53096	-7.531	-1.498	-8261.83	1165.83	10	12	0	0	742.891	0	1184.32	371.242	29.906	721.338	61.829	2206.84
A31B4	C1(C2=C3C(C=CC=C3)=C4C(C=CC=C4)=C2)=CC(C5=C(C=CC=C6)C6=C(C=CC=C7)C7=C5)=CC(C8=C9C(C=CC=C9)=C%10C(C=CC=C%10)=C8)=C1	3.12525	310	0.15585	0	0	0	0	118.383	508.343	61.218	33.809	47.518	0.045	356.078	9.675	0.048	0	606.752	11.836	0	0	3	0	90.006	200.168	102.618	182.682	0.15	0.11	0	0.1	8.68769	-8.688	-0.758	-6299.6	935.099	11	3	0	1	606.765	0	973.311	0	0	973.311	0	1848.69
A30B6	N(C1=CC=C(/C=C/C2=CC=CC=C2)C=C1)(C3=CC=C(/C=C/C4=CC=CC=C4)C=C3)C5=CC=C(/C=C/C6=CC=CC=C6)C=C5	4.09111	403.67	0.26825	0	0	0	0	82.698	130.925	29.481	14.45	77.716	0.21	259.967	-250.899	0.069	0	551.718	11.121	0	0	9	3.24	83.003	185.583	90.103	186.453	0.19	0.15	0.1	0.06	7.85218	-7.852	-0.713	-5787.77	997.734	12	12	0	0	551.729	0	1048.27	72.228	0.055	975.99	0	1882.79
A31B6	C1(/C=C/C2=CC=CC=C2)=CC(/C=C/C3=CC=CC=C3)=CC(/C=C/C4=CC=CC=C4)=C1	4.08749	350.136	0.28595	0	0	0	0	43.775	153.391	17.204	10.943	-4.582	0.419	161.112	-31.705	0.046	0	384.512	7.789	0	0	6	0	58.002	132.422	62.904	129.86	0.04	0.03	-0.01	0.03	8.97564	-8.976	-0.527	-4006.82	760.199	8	9	0	1	384.52	0	801.506	76.464	0	725.042	0	1394.92
A32B6	C1(C2(C3=C(C4=C2C=C(/C=C/C5=CC=CC=C5)C=C4)C=CC(/C=C/C6=CC=CC=C6)=C3)C7=C8C=CC(/C=C/C9=CC=CC=C9)=C7)=C8C=CC(/C=C/C%10=CC=CC=C%10)=C1	3.94428	379.651	0.56395	0	0	0	0	63.459	240.173	33.248	24.078	-74.497	0.465	291.147	-34.268	0.045	0	724.927	13.649	0	0	8	0	107.922	244.984	118.365	249.467	0.07	0	0.01	-0.07	8.4235	-8.423	-0.893	-7537.78	1230.06	13	12	0	1	724.943	0	1283.69	95.638	0	1188.06	0	2379.08
A32B7	C1(C2(C3=C(C4=C2C=C(C5=CC=CC=C5)C=C4)C=CC(C6=CC=CC=C6)=C3)C7=C8C=CC(C9=CC=CC=C9)=C7)=C8C=CC(C%10=CC=CC=C%10)=C1	4.27903	341.158	0.30145	0	0	0	0	68.457	275.921	33.967	14.964	-38.063	0.037	281.438	-16.422	0.046	0	620.778	11.777	0	0	4	0	91.922	203.71	104.453	196.115	0	0	0	0	8.60556	-8.606	-0.689	-6448.73	994.774	12	4	0	1	620.792	0	1060.01	0	0	1060.01	0	1967.94
A30B8	N(C1=CC=C(C2=CC=C(C=CC=C3)C3=C2)C=C1)(C4=CC=C(C5=CC(C=CC=C6)=C6C=C5)C=C4)C7=CC=C(C8=CC=C(C=CC=C9)C9=C8)C=C7	4.30131	371.172	0.26655	0	0	0	0	113.239	229.292	43.01	16.741	104.02	0.026	344.888	-279.392	0.047	0	623.782	12.443	0	0	6	3.24	93.005	203.978	104.743	195.605	0.23	-0.14	0.18	0	7.92729	-7.927	-0.697	-6525.77	1034.31	12	6	0	1	623.795	0	1084.63	0	0.056	1084.57	0	1989.76
A32B8	C1(C2(C3=C(C4=C2C=C(C5=CC=C(C=CC=C6)C6=C5)C=C4)C=CC(C7=CC(C=CC=C8)=C8C=C7)=C3)C9=C%10C=CC(C%11=CC=C(C=CC=C%12)C%12=C%11)=C9)=C%10C=CC(C%13=CC(C=CC=C%14)=C%14C=C%13)=C1	4.04602	349.239	0.4585	0	0	0	0	103.316	382.12	52.107	30.249	-46.967	0.023	406.802	-60.093	0.042	0	821.013	15.411	0	0	4	0	121.258	269.511	137.885	261.732	0.13	0.09	0.02	0.09	8.52569	-8.526	-0.831	-8521.76	1267.29	15	4	0	1	821.031	0	1314.59	0	0	1314.59	0	2510.95
A33B8	C1(C2=CC=C(C3=CC=C(C=CC=C4)C4=C3)C=C2)=CC(C5=CC=C(C6=CC(C=CC=C7)=C7C=C6)C=C5)=CC(C8=CC=C(C9=CC(C=CC=C%10)=C%10C=C9)C=C8)=C1	3.77409	330.364	0.33485	0	0	0	0	109.965	377.583	44.983	19.676	40.623	0.058	365.54	-93.297	0.047	0	684.864	13.666	0	0	6	0	102.006	226.226	116.316	206.71	0.02	-0.02	0.01	-0.01	8.85836	-8.858	-0.677	-7117.27	1151.79	13	6	0	1	684.878	0	1206.5	0	0	1206.5	0	2211.56
A33B9	C1(C2=CC=C(C3=CC=CC4=C3C=CC=C4)C=C2)=CC(C5=CC=C(C6=CC=CC7=C6C=CC=C7)C=C5)=CC(C8=CC=C(C9=CC=CC%10=C9C=CC=C%10)C=C8)=C1	3.09318	309	0.1989	0	0	0	0	129.467	499.858	53.805	23.037	102.185	0.214	371.084	-50.466	0.047	0	684.864	13.666	0	0	6	0	102.006	226.226	116.316	207.084	0.07	0.02	-0.06	0.03	8.76905	-8.769	-0.697	-7117.15	1130.86	13	6	0	1	684.878	0	1180.88	0	0	1180.88	0	2185.45
A32B11	C1(C2(C3=C(C4=C2C=C(C5=CC=CC(C6=CC=C7C8=CC=CC=C8C9=CC=CC=C9C7=C6)=C5)C=C4)C=CC(C%10=CC(C%11=CC=C%12C%13=CC=CC=C%13C%14=CC=CC=C%14C%12=C%11)=CC=C%10)=C3)C%15=C%16C=CC(C%17=CC=CC(C%18=CC=C%19C%20=CC=CC=C%20C%21=CC=CC=C%21C%19=C%18)=C%17)=C%15)=C%16C=CC(C%22=CC(C%23=CC=C%24C%25=CC=CC=C%25C%26=CC=CC=C%26C%24=C%23)=CC=C%22)=C1	4.31562	364.468	0.23275	0	0	0	0	266.975	1223.43	164.825	76.324	-26.561	0.911	889.704	118.227	0.153	0	1525.87	28.752	0	0	8	0	225.266	501.657	256.445	429.134	0.47	-0.25	0.2	-0.36	8.42837	-8.428	-0.807	-15831.1	1635.19	15	8	0	1	1525.9	0	1626.67	0	0	1626.67	0	3881.8
A31B12	C1(C2=CC=C(N(C3=CC=CC=C3)C4=CC=CC=C4)C=C2)=CC(C5=CC=C(N(C6=CC=CC=C6)C7=CC=CC=C7)C=C5)=CC(C8=CC=C(N(C9=CC=CC=C9)C%10=CC=CC=C%10)C=C8)=C1	4.38018	346	0.197	0	0	0	0	174.684	175.457	55.647	8.727	286.083	0.078	453.19	-628.267	0.035	0	808.019	16.383	0	0	12	9.72	121.005	260.948	134.067	257.819	0.44	0.23	-0.38	0.01	7.91767	-7.918	-0.428	-8532.87	1303.14	12	12	0	0	808.036	0	1356.43	0	0.119	1356.32	0	2545.79
A33B12	C1(C2=CC=C(C3=CC=C(N(C4=CC=CC=C4)C5=CC=CC=C5)C=C3)C=C2)=CC(C6=CC=C(C7=CC=C(N(C8=CC=CC=C8)C9=CC=CC=C9)C=C7)C=C6)=CC(C%10=CC=C(C%11=CC=C(N(C%12=CC=CC=C%12)C%13=CC=CC=C%13)C=C%11)C=C%10)=C1	4.16213	355.067	0.3441	0	0	0	0	211.685	289.247	69.512	12.356	309.513	0.1	572.087	-674.321	0.047	0	1036.31	20.938	0	0	15	9.72	155.007	336.357	172.839	325.573	0.15	-0.07	-0.13	-0.01	7.96287	-7.963	-0.671	-10905.3	1659.66	13	15	0	0	1036.33	0	1728.53	0	0.065	1728.46	0	3255.78
A1087B3	CC1=CC(C)=C(N(C2=CC=C(C3=CC=C(C#N)S3)C=C2)C4=CC=C(C5=CC=C(C#N)S5)C=C4)C(C)=C1	4.19342	419.175	0.2904	0	0	0	0	63.961	86.166	23.715	30.32	93.368	0.23	136.568	-198.035	0.04	0	501.664	9.725	2	0	5	107.3	76.67	148.776	72.822	162.551	7.42	-5.9	-4.49	-0.32	8.30587	-8.306	-1.345	-5028.67	816.973	3	5	0	-2	501.663	0	860.71	200.097	145.355	434.862	80.396	1556.1
A1090B3	CC(C)(C)C1=CC=C(N(C2=CC=C(C3=CC=C(C#N)S3)C=C2)C4=CC=C(C5=CC=C(C#N)S5)C=C4)C=C1	3.94463	416.52	0.28305	0	0	0	0	67.35	37.93	23.457	34.822	103.356	0.045	148.468	-272.218	0.048	0	515.691	9.666	2	0	6	107.3	78.586	152.319	74.657	167.723	7.75	-3.37	-5.58	-4.2	8.28666	-8.287	-1.392	-5178.25	858.541	6	6	0	-2	515.69	0	908.846	194.351	145.414	489.119	79.962	1625.78
A30B770	C1(N(C2=CC=C(C3=C4C(OCCO4)=CS3)C=C2)C5=CC=C(C6=C7C(OCCO7)=CS6)C=C5)=CC=C(C8=C9C(OCCO9)=CS8)C=C1	4.1357	377.421	0.17435	0	0	0	0	86.346	228.106	35	44.52	79.768	0.117	215.731	-147.031	0.038	0	665.798	8.253	6	0	6	143.34	92.504	177.645	87.481	-43.0938	5.53	-2.65	4.85	-0.06	7.66055	-7.661	-0.689	-7271.22	966.299	7	3	0	2	665.792	0	951.026	351.487	0.078	473.269	126.193	1784.99
A1106B770	C1(N(C2=CC=C(C3=C4C(OCCO4)=CS3)C=C2)C5=CC=C(C6=C7C(OCCO7)=CS6)C=C5)=CC=CC=C1	4.35572	376.083	0.10945	0	0	0	0	74.549	172.397	28.516	30.11	82.384	0.069	188.073	-156.755	0.049	0	525.638	7.223	4	0	5	96.64	74.003	144.836	71.953	-2.37885	3.44	2.25	0.18	2.6	7.74208	-7.742	-0.693	-5713.66	805.683	5	3	0	2	525.636	0	812.02	237.463	0.085	490.274	84.198	1483.32
A1100B10	O=C1N(CC(CC)CCCC)C(C2=C(C3=CC=C(C4=NC(C=CC=C5)=C5N4C6=CC=CC=C6)C=C3)SC(C7=CC=C(C8=NC(C=CC=C9)=C9N8C%10=CC=CC=C%10)C=C7)=C21)=O	4.24078	397.01	0.2041	0.3706	0.3706	0.4276	0.428	80.235	436.145	32.651	54.839	38.168	0.23	207.177	103.079	0.05	0	801.995	13.426	4	0	12	101.26	122.672	236.008	116.687	128.4	4.05	1.99	-0.36	-3.51	8.88093	-8.881	-1.56	-8664.29	1204.61	11	6	0	-1	802.004	0	1272.16	306.712	82.512	852.392	30.542	2432.68
A1066B12	O=S1(C(C=CC(C(C=C2)=CC=C2N(C3=CC=CC=C3)C4=CC=CC=C4)=C5)=C5C6=C1C=CC(C(C=C7)=CC=C7N(C8=CC=CC=C8)C9=CC=CC=C9)=C6)=O	4.14414	383.217	0.17015	0	0	0	0	128.342	131.529	41.025	6.802	197.156	0.041	334.892	-448.386	0.049	0	702.861	12.323	2	0	8	49	110.255	215.262	109.932	137.026	7.22	5.77	4.32	-0.38	8.13403	-8.134	-1.13	-7492.1	1098.5	9	8	0	-2	702.869	0	1148.2	0	86.246	1061.75	0.207	2124.46
A1087B2	CC1=CC(C)=CC(C)=C1N(C2=CC=C(C3=CC(C=CC=C4)=C4S3)C=C2)C5=CC=C(C6=CC(C=CC=C7)=C7S6)C=C5	4.24696	390.786	0.2675	0	0	0	0	79.53	-53.723	28.429	43.579	86.749	0.23	213.824	-426.534	0.049	0	551.763	11.784	0	0	5	59.72	75.004	170.202	85.834	126.851	1.7	-1.69	-0.09	-0.05	7.95083	-7.951	-0.689	-5475.53	888.098	9	3	0	1	551.763	0	925.56	200.643	0	646.368	78.548	1704.01
A1090B6	CC(C)(C)C1=CC=C(N(C2=CC=C(/C=C/C3=CC=CC=C3)C=C2)C4=CC=C(/C=C/C5=CC=CC=C5)C=C4)C=C1	4.24943	390.786	0.19855	0	0	0	0	76.81	64.31	28.903	18.559	78.485	0.134	233.083	-294.853	0.053	0	505.691	10.535	0	0	8	3.24	74.586	168.794	81.041	126.728	1.35	-0.75	-1.12	-0.06	7.76919	-7.769	-0.722	-5324.64	918.09	10	10	0	0	505.701	0	966.301	230.941	0.025	735.335	0	1747.94
TPA-OMe6	COC1=C(OC)C(OC)=CC(/C=C/C(C=C2)=CC=C2N(C3=CC=C(/C=C/C4=CC(OC)=C(OC)C(OC)=C4)C=C3)C5=CC=CC=C5)=C1	3.7224	390.786	0.3048	0	0	0	0	96.172	215.07	35.492	52.246	76.869	0.109	265.823	-215.47	0.089	0	629.741	9.037	6	0	13	58.62	98.671	188.907	88.533	-71.6221	2.98	2.33	-1.16	1.45	7.95345	-7.953	-0.676	-7393.65	1083.24	9	15	0	0	629.751	0	1093.36	579.017	0.021	514.318	0	2013.36
HTM-A	COC(C=C1)=CC=C1N(C2=CC=C(OC)C=C2)C3=CC=C(N(C4=CC=C(/C=C/C5=CC(OC)=C(OC)C(OC)=C5)C=C4)C6=CC=C(/C=C/C7=CC(OC)=C(OC)C(OC)=C7)C=C6)C=C3	3.81174	385.444	0.1431	0	0	0	0	146.44	167.732	50.51	75.068	162.613	0.151	382.332	-502.942	0.113	0	856.999	12.336	8	0	18	80.32	134.006	254.994	120.676	-93.6243	4.9	-1.47	-2.75	-3.77	7.5964	-7.596	-0.582	-10064.4	1406.45	13	20	0	0	857.013	0	1417.79	773.938	0.707	643.146	0	2664.04
HTM-E	COC1=C(OC)C(OC)=CC(/C=C/C(C=C2)=CC=C2N(C3=CC=C(/C=C/C4=CC(OC)=C(OC)C(OC)=C4)C=C3)C5=CC=C(N(C6=CC=CC=C6)C7=CC=CC=C7)C=C5)=C1	4.06703	384.999	0.15235	0	0	0	0	139.375	214.593	48.321	54.226	162.569	0.117	365.209	-415.849	0.189	0	796.947	12.369	6	0	16	61.86	123.672	242.068	115.732	-15.5815	3.93	1.89	-2.94	1.8	7.71986	-7.72	-0.615	-9174.59	1319.16	12	18	0	0	796.961	0	1338.69	583.236	0.298	755.161	0	2505.08
HTM-H	COC1=C(OC)C(OC)=CC(/C=C/C(C=C2)=CC=C2N(C3=CC=C(/C=C/C4=CC(OC)=C(OC)C(OC)=C4)C=C3)C5=CC=C(C6=CC=C7C8=C6C=CC9=CC=CC(C=C7)=C98)C=C5)=C1	4.14719	391.676	0.2637	0	0	0	0	138.002	374.119	59.49	69.556	92.709	0.155	387.554	-235.344	0.041	0	829.975	12.67	6	0	14	58.62	128.007	254.708	121.965	-10.0745	1.88	1.45	-0.99	-0.69	7.94475	-7.945	-1.197	-9466.81	1331.08	12	16	0	0	829.99	0	1359.11	571.182	0.033	787.894	0	2552.15
HTM-1	COC(C(OC)=C1)=C(OC)C=C1/C=C/C(C=C2)=CC=C2N(C3=CC=C(/C=C/C4=CC(OC)=C(OC)C(OC)=C4)C=C3)C5=CC=C(C6=CC=C(C7=CC=C(C8=CC=C(N(C9=CC=C(/C=C/C%10=CC(OC)=C(OC)C(OC)=C%10)C=C9)C%11=CC=C(/C=C/C%12=CC(OC)=C(OC)C(OC)=C%12)C=C%11)C=C8)S7)S6)C=C5	3.95697	397.01	0.2885	0	0	0	0	215.883	821.916	78.468	134.225	176.337	0.278	530.038	-97.429	0.383	0	1421.71	21.107	12	0	29	173.72	215.01	419.852	199.008	-92.7291	2.34	-2.07	-0.99	0.47	7.96926	-7.969	-1.207	-16150.4	2253.96	15	30	0	-2	1421.73	0	2279.76	1178.5	0.206	1040.87	60.183	4320.02
HTM-2	COC(C(OC)=CC(/C=C/C1=CC=C(N(C2=CC=C(C=C2)C3=CC(SC(C(C=C4)=CC=C4N(C(C=C5)=CC=C5/C=C/C(C=C6OC)=CC(OC)=C6OC)C(C=C7)=CC=C7/C=C/C(C=C8OC)=CC(OC)=C8OC)=C9)=C9S3)C(C=C%10)=CC=C%10/C=C/C(C=C%11OC)=CC(OC)=C%11OC)C=C1)=C%12)=C%12OC	3.97733	392.565	0.4096	0	0	0	0	210.103	794.453	75.631	119.878	178.277	0.266	524.232	-103.832	0.444	0	1395.68	20.497	12	0	28	173.72	211.01	411.166	194.442	-99.7648	2.19	1.08	-1.32	1.38	7.97682	-7.977	-1.131	-15877.8	2206.99	15	30	0	-2	1395.69	0	2230.04	1179.88	0.088	968.788	81.28	4219.09
HTM-3	COC(C(OC)=C1)=C(OC)C=C1/C=C/C(C=C2)=CC=C2N(C3=CC=C(/C=C/C4=CC(OC)=C(OC)C(OC)=C4)C=C3)C5=CC=C(C6=CC=C(C7=CC=C(N(C8=CC=C(/C=C/C9=CC(OC)=C(OC)C(OC)=C9)C=C8)C%10=CC=C(/C=C/C%11=CC(OC)=C(OC)C(OC)=C%11)C=C%10)C=C7)S6)C=C5	3.78501	395.233	0.3607	0	0	0	0	199.97	403.727	72.942	118.227	174.553	0.287	535.553	-497.835	0.169	0	1339.59	19.434	12	0	28	145.48	205.843	398.372	187.65	-118.619	3.43	-2.72	-2.07	-0.19	7.96055	-7.961	-0.881	-15455.5	2151.64	15	30	0	-2	1339.61	0	2169.4	1176.16	0.082	961.769	31.39	4109.28
HTM-4	COC(C(OC)=C1)=C(OC)C=C1/C=C/C(C=C2)=CC=C2N(C3=CC=C(/C=C/C4=CC(OC)=C(OC)C(OC)=C4)C=C3)C5=CC=C(C6=CC=C(C7=NSN=C76)C8=CC=C(N(C9=CC=C(/C=C/C%10=CC(OC)=C(OC)C(OC)=C%10)C=C9)C%11=CC=C(/C=C/C%12=CC(OC)=C(OC)C(OC)=C%12)C=C%11)C=C8)C=C5	4.17721	379.205	0.2783	0	0	0	0	217.094	858.057	82.842	112.987	162.604	0.225	569.478	-70.079	0.194	0	1391.62	19.408	14	0	28	171.26	215.177	414.549	193.502	-67.5905	2.44	0.53	-2.21	0.89	7.93359	-7.934	-1.73	-16072.5	2192.56	14	32	0	-2	1391.64	0	2211.41	1178.41	30.171	941.021	61.805	4207.02
TM-1	CC1=C(C2=CC3=C(C4=C(C5=C3C=C(C(C)(C)C)C=C56)C(C7=C6C=C(C(C)(C)C)C=C78)=C(C9=C8C=C(C(C)(C)C)C=C9%10)C(C%11=C%10C=C(C(C)(C)C)C=C%11%12)=C4C%13=C%12C=C(C(C)(C)C)C=C%13%14)C%14=C2)C(C)=[N+]%15C1=C(C%16=CC=C(N(C%17=CC=C(OC)C=C%17)C%18=CC=C(OC)C=C%18)C=C%16)C%19=C(C)C(C%20=CC%21=C(C%22=C(C%23=C%21C=C(C(C)(C)C)C=C%23C%24=C%25C%26=CC(C(C)(C)C)=C%24)C%25=C(C%27=C%26C=C(C(C)(C)C)C=C%27C%28=C%29C%30=CC(C(C)…	6	547	0.0439	0	0	0	0	434.789	1148.53	269.559	218.16	131.406	0.316	1296.39	-767.305	0.094	0	2152.64	39.672	2	0	18	31.56	312.525	682.082	319.24	-187.36	8.73	8.65	1.2	0.1	-99999	-99999	-99999	-23365.9	2759.78	14	17	2	0	2153.88	0	2869.99	2117.62	1.659	699.985	50.719	6101.93
TM-4	CC1=C(C#CC2=CC=C3C4=C5C(C=C3)=CC=CC5=CC=C24)C(C)=[N+]6C1=C(C7=CC=C(N(C8=CC=C(OC)C=C8)C9=CC=C(OC)C=C9)C=C7)C%10=C(C)C(C#CC%11=CC=C(C=C%12)C%13=C%11C=CC%14=CC=CC%12=C%13%14)=C(C)N%10[B-]6(F)F	6	640.64	0.2056	0	0	0	0	151.401	357.11	71.524	108.793	94.064	0.183	416.537	-333.991	0.168	0	998.938	16.597	2	0	8	31.56	161.343	286.18	146.188	2.2733	15.76	15.35	3.55	-0.41	-99999	-99999	-99999	-11250	1419.58	12	11	2	1	1000.16	0	1465.52	328.698	1.535	1084.68	50.612	2861.83
MCR-276	COC(C=C1)=CC=C1N(C2=CC3=C(C=C2)C4=C(C=C(N(C5=CC=C(OC)C=C5)C6=CC=C(OC)C=C6)C=C4)/C3=C\C7=CC=C(/C=C8C(C=C(N(C9=CC=C(OC)C=C9)C%10=CC=C(OC)C=C%10)C=C%11)=C%11C%12=C\8C=C(N(C%13=CC=C(OC)C=C%13)C%14=CC=C(OC)C=C%14)C=C%12)C=C7)C%15=CC=C(OC)C=C%15	4.2818	382.771	0.23795	0	0	0	0	250.897	274.246	82.351	103.587	379.978	1.051	577.391	-870.112	0.623	0	1339.57	21.336	8	0	22	86.8	205.344	408.226	199.374	44.591	5.6	3.98	1.87	3.47	7.513	-7.513	-0.729	-15154.1	1625.06	13	24	0	-1	1339.6	0	1699.36	609.443	2.66	1087.26	0	3715.59
MCR-284	COC(C=C1)=CC=C1N(C2=CC=C(OC)C=C2)C(C=C3)=CC=C3/C=C/C4=NC5=CC=CC=C5N=C4/C=C/C6=CC=C(N(C7=CC=C(OC)C=C7)C8=CC=C(OC)C=C8)C=C6	4.19028	460.561	0.1851	0	0	0	0	151.377	163.165	49.88	58.038	182.931	0.145	389.119	-516.949	0.182	0	788.93	12.51	6	0	14	69.18	122.672	239.79	116.64	86.8718	6.48	-4.34	-4.62	-1.31	7.74092	-7.741	-0.919	-8902.73	1146.73	11	16	0	-1	788.944	0	1199.99	378.927	27.105	793.961	0	2381.09
MCR-397	COC(C=C1)=CC2=C1N(C(C=C3)=CC=C3/C=C/C4=NC5=CC=CC=C5N=C4/C=C/C6=CC=C(N7C8=CC=C(OC)C=C8CCC9=C7C=CC(OC)=C9)C=C6)C%10CC=C(OC)C=C%10CC2	3.78819	436.391	0.19965	0	0	0	0	175.525	392.362	71.48	124.896	182.631	-0.363	391.938	-378.22	0.155	0	843.021	12.717	6	0	10	69.18	126.506	259.087	119.36	78.6035	2.44	0.82	1.91	-1.27	7.42183	-7.422	-1.145	-9475.09	1130.57	10	10	0	0	843.035	0	1137.09	470.489	18.693	647.907	0	2398
TMF-2	COC1=CC2=C(N(C3=CC4=C(C5=C(/C4=C\C6=CC=C(C=C6)N(C7=CC=CC=C7)C8=CC=CC=C8)C=C(C=C5)N(C9=CC=C(C=C9CC%10)OC)C%11=C%10C=C(C=C%11)OC)C=C3)C%12=CC=C(C=C%12CC2)OC)C=C1	4.20454	412	0.0965	0	0	0	0	211.476	332.089	89.765	126.215	269.103	1.314	476.608	-630.916	0.13	0	928.123	16.117	4	0	10	46.64	138.341	286.863	139.527	90.9343	3.42	0.5	1.19	3.17	7.5171	-7.517	-0.96	-10312.1	1215.68	13	9	0	-1	928.14	0	1235.4	505.659	0	729.742	0	2627.39
MCR-403	COC(C=C1)=CC=C1N(C2=CC=C(OC)C=C2)C(C=C3)=CC=C3C(S4)=CC=C4/C=C/C5=NC6=CC=CC=C6N=C5/C=C/C7=CC=C(C8=CC=C(N(C9=CC=C(OC)C=C9)C%10=CC=C(OC)C=C%10)C=C8)S7	4.63308	478.495	0.20655	0	0	0	0	158.67	197.006	52.91	79.511	194.411	0.089	394.28	-524.194	0.194	0	953.178	15.642	6	0	16	125.66	141.006	282.749	139.356	144.295	6.85	-5.16	-3.91	-2.24	7.71105	-7.711	-1.161	-10292.6	1509.34	12	16	0	0	953.184	0	1533.74	407.874	15.791	1049.03	61.053	2873.82
MCR-428	COC(C=C1)=CC2=C1N(C(S3)=CC=C3/C=C/C4=NC5=CC=CC=C5N=C4/C=C/C6=CC=C(N7C8=CC=C(OC)C=C8CCC9=C7C=CC(OC)=C9)S6)C%10=CC=C(OC)C=C%10CC2	3.82349	515.871	0.11775	0	0	0	0	153.55	437.886	54.092	130.056	182.289	-1.699	301.275	-228.126	0.939	0	853.06	14.033	6	0	10	125.66	123.006	250.408	119.3	78.6578	8.2	-5.16	-4.14	-4.84	8.04428	-8.044	-1.02	-9256.71	1075.12	10	10	0	0	853.064	0	1103.49	400.374	18.876	658.325	25.919	2342.55
PyBDP-1	F[B-]([N+]1=C(/C=C/C2=CC=C(N(C3=CC=CC=C3)C4=CC=CC=C4)C=C2)C=C(C)C1=C5C6=C(C=CC7=CC=C8)C(C7=C8C=C9)=C9C=C6)(F)N%10C5=C(C)C=C%10/C=C/C%11=CC=C(N(C%12=CC=CC=C%12)C%13=CC=CC=C%13)C=C%11	4.34602	720.101	0.29085	0	0	0	0	159.254	298.884	63.381	73.591	178.736	0.263	408.62	-425.706	0.096	0	958.941	16.591	0	0	11	14.42	149.674	295.719	144.069	82.0955	5.25	-5.02	-1.11	-1.07	7.77777	-7.778	-1.749	-10625.4	1400	13	13	3	0	975.129	0	1486.78	131.941	3.762	1307.94	43.136	2878.45
PyBDP-2	F[B-]([N+]1=C(/C=C/C2=CC=C(N(C3=CC=C(OC)C=C3)C4=CC=C(OC)C=C4)C=C2)C=C(C)C1=C5C6=C(C=CC7=CC=C8)C(C7=C8C=C9)=C9C=C6)(F)N%10C5=C(C)C=C%10/C=C/C%11=CC=C(N(C%12=CC=C(OC)C=C%12)C%13=CC=C(OC)C=C%13)C=C%11	6	750.615	0.2197	0	0	0	0	175.003	194.801	68.497	114.39	182.169	0.421	437.655	-608.331	0.343	0	1079.04	16.526	4	0	15	51.34	170.342	321.572	153.957	-77.2717	3.77	-2.52	-2.59	-1.08	7.53378	-7.534	-1.607	-12405	1470.35	13	17	3	0	1095.23	0	1476.13	456.284	3.008	985.81	31.032	3051.19
PyBDP-3	F[B-]([N+]1=C(/C=C/C2=CC=C(N(C3=CC=C(OCCCCCC)C=C3)C4=CC=C(OCCCCCC)C=C4)C=C2)C=C(C)C1=C5C6=C(C=CC7=CC=C8)C(C7=C8C=C9)=C9C=C6)(F)N%10C5=C(C)C=C%10/C=C/C%11=CC=C(N(C%12=CC=C(OCCCCCC)C=C%12)C%13=CC=C(OCCCCCC)C=C%13)C=C%11	4.17975	747.375	0.2054	0	0	0	0	181.867	170.492	71.115	125.091	192.327	0.265	439.87	-658.177	0.303	0	1359.58	25.49	4	0	35	51.34	200.342	413.873	190.657	-183.505	4.06	-3.4	1.76	1.35	7.4373	-7.437	-1.608	-15404.7	2229.91	14	37	3	-2	1375.77	0	2318.74	1216.17	3.511	1054.12	44.944	4406.47
PyBDP-4	F[B-]([N+]1=C(/C=C/C2=CC=C(N(CCCC)C3=CC=CC=C3S4)C4=C2)C=C(C)C1=C5C6=C(C=CC7=CC=C8)C(C7=C8C=C9)=C9C=C6)(F)N%10C5=C(C)C=C%10/C=C/C%11=CC%12=C(N(CCCC)C%13=C(S%12)C=CC=C%13)C=C%11	5.50761	723.37	0.2655	0	0	0	0	151.209	604.607	73.51	101.548	96.486	3.131	356.954	-27.022	0.076	0	979.06	16.672	0	0	11	65.02	141.674	297.163	137.353	-1.82528	4.11	-3.84	-1.2	-0.8	7.35204	-7.352	-1.593	-10543.9	1316.07	12	13	3	0	995.237	0	1362.87	504.263	8.054	789.912	60.644	2768.68
PyBDP-5	F[B-]([N+]1=C(/C=C/C2=CC=C(N(CCCC)C3=CC=CC=C34)C4=C2)C=C(C)C1=C5C6=C(C=CC7=CC=C8)C(C7=C8C=C9)=C9C=C6)(F)N%10C5=C(C)C=C%10/C=C/C%11=CC%12=C(N(CCCC)C%13=C%12C=CC=C%13)C=C%11	4.72061	719.692	0.2956	0	0	0	0	107.262	436.01	49.859	109.77	17.573	0.234	273.212	-14.638	0.071	0	914.93	15.801	0	0	11	17.8	138.008	277.03	131.485	-2.09035	1.21	-1.12	-0.18	-0.41	7.82971	-7.83	-1.652	-10190.1	1358.45	12	13	3	0	931.117	0	1417.1	491.477	8.449	876.68	40.496	2742.98
HTL-B	C1=CC=C2C(=C1)C3=CC=CC=C3N2C4=CC=C(C=C4)N(C5=CC=C(C=C5)N6C7=CC=CC=C7C8=CC=CC=C86)C9=CC=C(C=C9)N1C2=CC=CC=C2C2=CC=CC=C21	3.9052	336.663	0.2031	0	0	0	0	128.14	464.419	45.054	53.083	106.424	0.151	344.284	-84.577	0.034	0	740.89	14.719	0	0	6	18.03	110.006	228.379	120.37	264.463	0	0	0	0	7.84422	-7.844	-0.707	-7860.73	1128.46	13	3	0	1	740.905	0	1184.29	0	0.405	1183.88	0	2224.61
HTL-C	C1=CC=C2C(=C1)C3=CC=CC=C3N2C4=CC=C(C=C4)C5=CC(=CC(=C5)C6=CC=C(C=C6)N7C8=CC=CC=C8C9=CC=CC=C97)C1=CC=C(C=C1)N1C2=CC=CC=C2C2=CC=CC=C21	4.23935	340.26	0.202	0	0	0	0	124.448	613.247	47.514	56.346	43.728	0.177	367.371	98.11	0.044	0	801.972	15.941	0	0	6	14.79	119.007	250.627	131.943	275.418	0.01	0.01	0	0	8.26393	-8.264	-0.813	-8452.26	1246.43	15	3	0	1	801.988	0	1299.53	0	0.093	1299.43	0	2442.27
TPA-BCN	N#CC1=CC=C(C2=CC=C(N(C3=CC=C(C4=CC=C(C#N)C=C4)C=C3)C5=CC=C(C6=CC=C(C#N)C=C6)C=C5)C=C2)C=C1	3.98979	390.786	0.22465	0	0	0	0	85.887	190.601	28.666	4.843	104.855	0.034	243.259	-191.058	0.016	0	548.635	9.354	3	0	7	74.61	95.504	171.84	85.225	237.442	0.01	-0.01	0	0	8.46134	-8.461	-1.261	-5856.01	933.09	7	9	0	-2	548.645	0	988.314	0	215.165	773.149	0	1767.01
[truncated: 1,878 more columns]

## Sheet: descriptor definitions
Descriptor	Definition
RDKit descriptors (columns DB:LC)	https://www.rdkit.org/docs/source/rdkit.Chem.Descriptors.html
Mordred descriptors (columns LD:BVD)	https://mordred-descriptor.github.io/documentation/master/descriptors.html
vvv semi-empirical computational chemistry descriptors (Patrick Duchstein, columns F:DA) vvvv
Potential Energy-S-OPLS	force field energy
Van der Waal Energy-S-OPLS	force field vdW energy
Electrostatic Energy-S-OPLS	force field coloumb energy
MW	Molecular weight
AlogP	Atom-based partition coefficient
PSA	Van der Waals surface area of polar nitrogen and oxygen atoms and carbonyl carbon atoms
Estate	Electrotopological states
MR	molar refractivity
Polar	Miller polarizability
MOPAC Heat of Formation
Dipole	dipole moment
Ionization Energy
HOMO Energy
LUMO Energy
MOPAC Total Energy EV
mySASA	Solvent Accessible Surface (Patrick Duchstein algorithm)
#rotor	Number of non-trivial (not CX3), non-hindered (not alkene, amide, small ring) rotatable bonds.
SASA	Solvent Accessible Surface
FOSA	Hydrophobic component of the SASA (saturated carbon and attached hydrogen).
FISA	Hydrophilic component of the SASA (SASA on N, O, H on heteroatoms, carbonyl C).
PISA	π (carbon and attached hydrogen) component of the SASA.
WPSA	Weakly polar component of the SASA (halogens, P, and S).
volume	Total solvent-accessible volume in cubic angstroms using a probe with a 1.4 Å radius.
accptHB	Estimated number of hydrogen bonds that would be accepted by the solute from water molecules in an aqueous solution. Values are averages taken over a number of configurations, so they can be non-integer.
glob	Globularity descriptor
QPpolrz	Predicted polarizability in cubic angstroms.
QPlogPC16	Predicted hexadecane/gas partition coefficient.
QPlogPoct	Predicted octanol/gas partition coefficient.
QPlogPw	Predicted water/gas partition coefficient.
QPlogPo/w	Predicted octanol/water partition coefficient.
QPlogS	Predicted aqueous solubility, log S
CIQPlogS	Conformation-independent predicted aqueous solubility, log S
QPlogHERG	Predicted IC50 value for blockage of HERG K+ channels.
QPPCaco	Predicted apparent Caco-2 cell permeability in nm/sec. Caco-2 cells are a model for the gut-blood barrier.
QPlogBB	Predicted brain/blood partition coefficient.
QPPMDCK	Predicted apparent MDCK cell permeability in nm/sec. MDCK cells are considered to be a good mimic for the blood-brain barrier.
QPlogKp	Predicted skin permeability, log Kp.
#metab	Number of likely metabolic reactions
QPlogKhsa	Prediction of binding to human serum albumin.
PSA-1
#NandO	Number of nitrogen and oxygen atoms.
#ringatoms	Number of atoms in a ring
#in56	Number of atoms in 5- or 6-membered rings
#nonHatm	Number of heavy atoms (nonhydrogen atoms)
2Potential Energy-S-OPLS	force field energy dimer
ddiff Potential Energy-S-OPLS	difference Dimer-2*Monomer
2Van der Waal Energy-S-OPLS	force field vdW energy Dimer
ddiff Van der Waal Energy-S-OPLS	difference Dimer-2*Monomer
2mySASA	Solvent Accessible Surface Dimer
ddiff mySASA	difference Dimer-2*Monomer
2Dipole	Dipole moment Dimer
diff Dipole	difference Dimer-Monomer
2HOMO Energy	HOMO Energy Dimer
diff HOMO Energy	difference Dimer-Monomer
2LUMO Energy	LUMO Energy Dimer
diff LUMO Energy	difference Dimer-Monomer
2Ionization Energy	Ionization Energy Dimer
diff Ionization Energy	difference Dimer-Monomer
2MOPAC Heat of Formation
diff MOPAC Heat of Formation	difference Dimer-Monomer
2MOPAC Total Energy EV
diff MOPAC Total Energy EV	difference Dimer-Monomer

## Sheet: GPR results
	RMSE (train)	RMSE (test)	R2CV	R2
log10(AED90)	2.49842e-06	2.62677e-06	1	1
band_position (nm)	0.442276	0.451228	-0.614563	0.433755
band_height	0.594815	0.569786	-1.2045	-0.0232258
Ionization Penalty	0.585508	0.597336	-0.446811	0.00848923
Ionization Penalty Neutral	0.570836	0.63887	-0.537833	0.0582027
State Penalty	0.595818	0.580298	-0.366347	-0.0282009
Charging Adjusted Penalty	0.593647	0.574312	-0.337217	-0.0198701
Energy	0.576701	0.546389	-1.36172	0.0374495
Potential Energy-S-OPLS	0.567037	0.624871	-0.49008	0.0705759
Stretch Energy-S-OPLS	0.544498	0.519502	-1.08778	0.142534
Bend Energy-S-OPLS	0.544363	0.513821	-2.02107	0.142096
Torsional Energy-S-OPLS	0.590021	0.581595	-0.702852	-0.00729874
Improper Torsional Energy-S-OPLS	0.572907	0.511913	-0.919784	0.0508901
Van der Waal Energy-S-OPLS	0.545681	0.558302	-0.879336	0.138223
Electrostatic Energy-S-OPLS	0.57506	0.556143	-0.638094	0.0428374
RMS Derivative-S-OPLS	0.590957	0.583188	-0.934786	-0.010788
MW	0.54729	0.554421	-1.24358	0.132668
AlogP	0.527123	0.57467	-4.17859	0.196483
HBA	0.612806	0.539985	-0.845091	-0.0854452
RB	0.585347	0.59362	-0.709615	0.00857002
PSA	0.588298	0.601991	-0.651563	-0.000990311
Estate	0.56573	0.534686	-0.655717	0.0747715
MR	0.571522	0.565176	-0.285814	0.0520487
Polar	0.555832	0.548227	-0.921137	0.105456
MOPAC Heat of Formation	0.581217	0.553293	-0.696686	0.0223061
Dipole	0.52824	0.492976	-0.964954	0.193169
Dipole X	0.551984	0.559646	-0.56985	0.118991
Dipole Y	0.598568	0.55942	-1.03826	-0.0365991
Dipole Z	0.589489	0.588077	-0.64527	-0.00530667
MOPAC Total Energy EV	0.544498	0.561813	-2.34172	0.142547
mySASA	0.570634	0.581917	-1.74398	0.0570859
#stars	0.578512	0.61195	-0.60635	0.0325778
#rotor	0.573024	0.628697	-0.496196	0.0508493
#rtvFG	0.465128	0.410121	-0.136657	0.37469
CNS	0	0	0	0
mol MW	0.558767	0.520248	-2.89258	0.0974885
SASA	0.555478	0.58355	-1.22141	0.106429
FOSA	0.582291	0.555492	-0.847521	0.0192398
FISA	0.587419	0.5948	-0.453786	0.00224427
PISA	0.612995	0.530166	-0.317453	-0.0861759
WPSA	0.577507	0.579185	-0.552467	0.0351695
volume	0.58344	0.522493	-0.939582	0.0151078
accptHB	0.612368	0.543865	-0.456092	-0.0838247
glob	0.5818	0.592163	-3.25609	0.0216303
QPpolrz	0.597987	0.503476	-0.249381	-0.0340075
QPlogPC16	0.578084	0.561236	-1.29365	0.0325079
QPlogPoct	0.564257	0.527123	-1.20318	0.0780147
QPlogPw	0.580902	0.606795	-0.699317	0.0242131
QPlogPo/w	0.554031	0.566392	-0.869534	0.112153
QPlogS	0.58916	0.571981	-1.11481	-0.00380369
CIQPlogS	0.579135	0.550204	-1.02342	0.0296139
QPlogHERG	0.604848	0.54811	-0.44316	-0.0578379
QPPCaco	0.58374	0.601186	-0.580215	0.0139125
QPlogBB	0.589247	0.5885	-0.916272	-0.00435201
QPPMDCK	0.543569	0.585856	-1.51592	0.146028
QPlogKp	0.58373	0.598638	-0.501542	0.0142972
#metab	0.603725	0.549932	-0.510559	-0.0541596
QPlogKhsa	0.538133	0.559981	-1.42437	0.16137
PercentHumanOralAbsorption	0.595104	0.570509	-0.564714	-0.0243451
SAfluorine	0.545777	0.580645	-20.5641	0.138961
PSA-1	0.592555	0.576924	-0.345944	-0.0152405
#NandO	0.594538	0.576334	-0.454769	-0.0228019
RuleOfFive	0.597287	0.575624	-1.03947	-0.0322717
RuleOfThree	0.591522	0.570442	-0.262699	-0.0126765
#ringatoms	0.572192	0.582841	-0.61038	0.0527475
#in56	0.566967	0.549541	-0.517833	0.067943
#noncon	0.599393	0.571689	-0.960277	-0.0387892
#nonHatm	0.546023	0.56125	-0.940486	0.134678
2Potential Energy-S-OPLS	0.601123	0.558803	-0.571267	-0.0455182
ddiff Potential Energy-S-OPLS	0.609339	0.52793	-0.34086	-0.0731284
2Van der Waal Energy-S-OPLS	0.568975	0.579934	-1.52817	0.0625405
ddiff Van der Waal Energy-S-OPLS	0.599491	0.550219	-1.88127	-0.0400644
2mySASA	0.58267	0.566535	-0.189095	0.017103
ddiff mySASA	0.567594	0.550543	-0.825364	0.0682359
2Dipole	0.532084	0.465426	-3.02202	0.181599
diff Dipole	0.592037	0.547824	-0.524458	-0.0145127
2MOPAC Heat of Formation	0.551054	0.602436	-0.889231	0.121777
diff MOPAC Heat of Formation	0.57694	0.531231	-1.26522	0.0368882
2MOPAC Total Energy EV	0.564574	0.512896	-1.22763	0.0784116
diff MOPAC Total Energy EV	0.571765	0.554135	-0.600171	0.0544417
hasVinyl	0.56816	0.574394	-1.01431	0.066439
hasS1	0.578535	0.613144	-0.466606	0.0325104
hasN2	0.605023	0.553801	-1.28193	-0.0589201
myVinyldist_inverted	0.568312	0.634557	-0.698597	0.0665123
myS1dist_inverted	0.571845	0.642112	-0.272528	0.0548045
myN2dist_inverted	0.601231	0.55427	-0.425726	-0.0455032
PISA/volume	0.568384	0.591448	-0.412271	0.0650656
PISA/SASA	0.561771	0.596777	-1.29468	0.0857091
PISA/mySASA	0.571724	0.579985	-1.29639	0.0530613
MaxAbsEStateIndex	0.443215	0.431835	-2.13394	0.431305
MaxEStateIndex	0.43505	0.462771	-1.07471	0.45243
MinAbsEStateIndex	0.556084	0.545333	-0.840902	0.105148
MinEStateIndex	0.424948	0.434734	-2.14736	0.477702
qed	0.577227	0.5703	-0.616092	0.0368716
SPS	0.515991	0.522442	-0.622756	0.230398
MolWt	0.536084	0.57423	-1.34617	0.16844
HeavyAtomMolWt	0.555471	0.525935	-0.875536	0.107664
ExactMolWt.1	0.535592	0.558664	-2.97965	0.170564
NumValenceElectrons	0.56288	0.515578	-1.60782	0.0840664
MaxPartialCharge	0.423816	0.393885	-3.09412	0.480769
MinPartialCharge	0.574055	0.544398	-0.321011	0.0468833
MaxAbsPartialCharge	0.480157	0.463131	-1.08367	0.332859
MinAbsPartialCharge	0.425215	0.423088	-0.750894	0.476962
FpDensityMorgan1	0.567931	0.544276	-0.768772	0.0668468
FpDensityMorgan2	0.572226	0.541758	-0.602791	0.0528811
FpDensityMorgan3.1	0.573022	0.544453	-0.798894	0.0505332
BCUT2D_MWHI	0.581246	0.600084	-0.683261	0.0233115
BCUT2D_MWLOW	0.561906	0.569289	-0.417652	0.0863571
BCUT2D_CHGHI	0.486428	0.471138	-1.99363	0.315612
BCUT2D_CHGLO	0.525783	0.509614	-1.09915	0.200082
BCUT2D_LOGPHI	0.545751	0.582128	-0.810397	0.138238
BCUT2D_LOGPLOW	0.43178	0.424473	-0.187718	0.460994
BCUT2D_MRHI	0.588392	0.553728	-1.08412	-0.00123655
BCUT2D_MRLOW	0.475846	0.501343	-1.37599	0.344977
AvgIpc	0.599938	0.585899	-0.404973	-0.0417232
BalabanJ	0.56419	0.564157	-0.820317	0.0788801
BertzCT	0.509906	0.512136	-0.866698	0.247671
Chi0	0.545933	0.54628	-1.0773	0.135468
Chi0n	0.525866	0.597081	-0.829422	0.199187
Chi0v	0.537521	0.556274	-2.06723	0.163686
Chi1	0.560995	0.517778	-1.65148	0.0895043
Chi1n	0.538005	0.542024	-1.04162	0.162161
Chi1v	0.533946	0.554932	-0.947945	0.175869
Chi2n	0.5278	0.506459	-0.445244	0.193472
Chi2v	0.509408	0.532275	-0.0621019	0.249992
Chi3n	0.532076	0.517104	-1.20626	0.180743
Chi3v	0.509271	0.553875	-0.728343	0.250395
Chi4n	0.52985	0.482073	-0.828459	0.188532
Chi4v	0.539634	0.497675	-1.41444	0.158298
HallKierAlpha	0.575727	0.531357	-1.05944	0.0411176
Ipc	0.569921	0.557984	-0.327956	0.0553212
Kappa1	0.555887	0.572096	-1.3695	0.106884
Kappa2	0.564643	0.62044	-0.819664	0.0781208
Kappa3	0.591342	0.577636	-0.446878	-0.011267
LabuteASA	0.548562	0.575543	-1.00017	0.129056
PEOE_VSA1	0.576403	0.59875	-1.10294	0.0391727
PEOE_VSA10	0.574182	0.593282	-0.440177	0.045283
PEOE_VSA11	0.596785	0.567495	-0.572401	-0.0306412
PEOE_VSA12	0.595876	0.549284	-0.717739	-0.0267386
PEOE_VSA13	0.598776	0.567326	-1.40571	-0.0371084
PEOE_VSA14	0.426219	0.384175	-1.10377	0.474428
PEOE_VSA2	0.596756	0.568389	-0.46008	-0.0302243
PEOE_VSA3	0.595028	0.574077	-0.497991	-0.0242779
PEOE_VSA4	0.596111	0.58314	-0.476368	-0.0277768
PEOE_VSA5	0.601537	0.552537	-0.566567	-0.0467284
PEOE_VSA6	0.591411	0.579965	-0.382911	-0.0118981
PEOE_VSA7	0.524213	0.555477	-1.15394	0.205609
PEOE_VSA8	0.52128	0.510446	-1.19355	0.213543
PEOE_VSA9	0.59174	0.586486	-0.891124	-0.0127817
SMR_VSA1	0.602023	0.54632	-1.64764	-0.0481621
SMR_VSA10	0.485369	0.509937	-0.861275	0.31871
SMR_VSA2	0.591483	0.577851	-0.398974	-0.0120914
SMR_VSA3	0.590343	0.559411	-1.35263	-0.008288
SMR_VSA4	0.609098	0.54657	-0.823875	-0.0733003
SMR_VSA5	0.52521	0.520658	-0.382891	0.200902
SMR_VSA6	0.601403	0.557564	-0.398056	-0.0460996
SMR_VSA7	0.587515	0.541458	-0.520848	0.00162965
SMR_VSA9	0.59052	0.560792	-0.768254	-0.00902965
SlogP_VSA1	0.582523	0.603335	-1.03463	0.018976
SlogP_VSA10	0.59857	0.519898	-0.542959	-0.0356796
SlogP_VSA11	0.577773	0.611504	-0.508206	0.0332293
SlogP_VSA12	0.605017	0.548028	-0.909082	-0.0595391
SlogP_VSA2	0.589295	0.578761	-0.607452	-0.0042904
SlogP_VSA3	0.580009	0.587592	-0.834526	0.0258365
SlogP_VSA4	0.575824	0.584716	-0.46239	0.0415975
SlogP_VSA5	0.507553	0.539216	-0.328674	0.254848
SlogP_VSA6	0.601144	0.560184	-0.589586	-0.0450933
SlogP_VSA8	0.579667	0.548042	-0.994315	0.0274698
TPSA	0.593537	0.580507	-0.395992	-0.0190967
EState_VSA1	0.579018	0.578323	-38.7091	0.0305361
EState_VSA10	0.590005	0.58497	-0.45844	-0.00691663
EState_VSA11	0.524844	0.535032	-0.301718	0.203851
EState_VSA2	0.556464	0.554409	-0.85538	0.104253
EState_VSA3	0.588646	0.588635	-0.667599	-0.00280504
EState_VSA4	0.557969	0.566167	-1.54092	0.100177
EState_VSA5	0.587166	0.567261	-0.820945	0.00307933
EState_VSA6	0.58651	0.59723	-0.562354	0.00399762
EState_VSA7	0.551723	0.535897	-2.04476	0.117626
EState_VSA8	0.574214	0.628273	-0.682121	0.0468764
EState_VSA9	0.586383	0.593436	-0.667706	0.00476086
VSA_EState1	0.57672	0.54302	-6.13703	0.0365854
VSA_EState10	0.570088	0.652112	-0.872736	0.0604388
VSA_EState2	0.61025	0.533727	-0.880122	-0.0769643
VSA_EState3	0.550838	0.565809	-0.911378	0.120903
VSA_EState4	0.590067	0.581395	-0.48574	-0.00773221
VSA_EState5	0.601979	0.537993	-1.00653	-0.0477017
VSA_EState6	0.586952	0.592756	-0.535942	0.00323893
VSA_EState7	0.593241	0.588376	-0.593993	-0.0185119
VSA_EState8	0.530458	0.534961	-0.730794	0.186138
VSA_EState9	0.60247	0.574201	-0.804659	-0.0500605
FractionCSP3.1	0.586085	0.539336	-0.930327	0.00617232
HeavyAtomCount	0.542858	0.559867	-0.51021	0.146961
NOCount	0.595094	0.581996	-0.717762	-0.0252419
NumAliphaticCarbocycles	0.58747	0.591498	-0.544102	0.000948166
NumAliphaticHeterocycles	0.510838	0.495473	-0.71813	0.244467
NumAliphaticRings	0.536584	0.556433	-1.3674	0.167225
NumAromaticCarbocycles	0.565129	0.556709	-0.494346	0.0729397
NumAromaticHeterocycles	0.59049	0.585404	-0.405694	-0.00903642
NumAromaticRings	0.559178	0.566531	-0.261542	0.0942132
NumHAcceptors	0.589426	0.590054	-1.34947	-0.00576598
NumHeteroatoms	0.590255	0.566467	-0.852606	-0.00809084
NumRotatableBonds.1	0.589004	0.58713	-0.659021	-0.00329748
RingCount	0.529454	0.544389	-1.74388	0.189772
MolLogP.1	0.562721	0.497504	-0.783126	0.0846822
MolMR.1	0.557739	0.551866	-0.825656	0.0994887
fr_Ar_N	0.604783	0.509476	-0.299424	-0.0574045
fr_C_O	0.57385	0.632203	-0.252103	0.0482302
fr_C_O_noCOO.1	0.593542	0.582755	-0.708242	-0.0187194
fr_NH0	0.561954	0.506313	-0.822006	0.0868574
fr_allylic_oxid	0.45637	0.457958	-1.23514	0.397133
fr_amide	0.588403	0.593097	-0.384264	-0.000859094
fr_aniline	0.589846	0.581656	-0.610843	-0.00650979
fr_aryl_methyl	0.587005	0.595741	-0.391326	0.00276553
fr_benzene	0.568989	0.559329	-0.528754	0.0623475
fr_bicyclic	0.596615	0.563611	-0.479661	-0.03009
fr_ether	0.589371	0.599205	-0.933925	-0.00512328
fr_halogen	0.544393	0.488697	-7.41281	0.143063
fr_imidazole	0.585679	0.598099	-0.586833	0.00776636
fr_imide	0.599265	0.560736	-0.350371	-0.03891
fr_methoxy	0.603824	0.548966	-0.446679	-0.0541287
fr_nitrile	0.606573	0.545351	-0.519227	-0.0637053
fr_para_hydroxylation	0.577572	0.613802	-0.45328	0.0356536
fr_sulfone	0.591719	0.581251	-0.295508	-0.0133719
fr_thiophene	0.5847	0.593538	-0.420586	0.0114786
fr_unbrch_alkane	0.597051	0.575046	-1.08814	-0.0309598
SpAbs_A	0.565836	0.562521	-0.216318	0.074608
SpMax_A	0.515312	0.510326	-1.61393	0.231658
SpDiam_A	0.490864	0.492426	-1.20508	0.302913
SpAD_A	0.547338	0.540836	-1.42166	0.132936
SpMAD_A	0.576618	0.588522	-0.895708	0.0388286
LogEE_A	0.558714	0.536724	-1.10223	0.0966988
VE1_A	0.603437	0.551236	-0.531139	-0.0537032
VE2_A	0.535599	0.564032	-0.440852	0.169864
VE3_A	0.577085	0.556692	-0.416702	0.0368234
VR1_A	0.589621	0.588505	-12.663	-0.00582146
VR2_A	0.598892	0.559249	-0.3432	-0.0373402
VR3_A	0.524264	0.565937	-4.71267	0.205547
nAromAtom	0.562292	0.586767	-0.649656	0.0861863
nAromBond	0.581476	0.544585	-0.484682	0.0216843
nAtom	0.559156	0.515503	-0.968441	0.0951111
nHeavyAtom	0.574697	0.467419	-0.643339	0.0454066
nSpiro	0.599942	0.568295	-0.543398	-0.0412473
nHetero	0.591717	0.551404	-1.13379	-0.0128776
nH	0.55727	0.563247	-0.977119	0.101494
nB	0.41578	0.411197	-0.870397	0.499816
nC	0.557125	0.516438	-1.0456	0.102902
nN	0.547946	0.538357	-0.48594	0.130933
nO	0.598775	0.56196	-0.474564	-0.036869
nS	0.601722	0.558682	-0.572399	-0.04726
nF	0.553701	0.457353	-7.79582	0.113897
nX	0.47079	0.456848	-0.618975	0.352556
ATS0dv	0.571965	0.538742	-0.978448	0.0543089
ATS1dv	0.554457	0.526119	-1.47729	0.110707
ATS2dv	0.514401	0.521086	-1.42815	0.23436
ATS3dv	0.538088	0.496315	-1.47105	0.16237
ATS4dv	0.491241	0.537842	-0.71639	0.302031
ATS5dv	0.497599	0.554486	-1.40918	0.28379
ATS6dv	0.499612	0.5129	-0.72858	0.277734
ATS7dv	0.506609	0.520227	-0.604251	0.258207
ATS8dv	0.507301	0.530369	-1.10793	0.2543
ATS0d	0.516271	0.554137	-0.357619	0.228061
ATS1d	0.534589	0.507326	-0.731357	0.173716
ATS2d	0.538535	0.511448	-0.872375	0.161099
ATS3d	0.521992	0.527817	-0.491423	0.210988
ATS4d	0.525033	0.508699	-1.62032	0.201813
ATS5d	0.530825	0.505888	-0.665434	0.184694
ATS6d	0.524749	0.500339	-0.426942	0.201823
ATS7d	0.518885	0.522009	-0.206408	0.221316
ATS8d	0.516748	0.519759	-1.38859	0.227014
ATS0s	0.542334	0.503634	-1.92381	0.149522
ATS1s	0.560091	0.523824	-1.63168	0.0933261
ATS2s	0.548702	0.52855	-0.801005	0.129571
ATS3s	0.545182	0.489653	-2.37687	0.140664
ATS4s	0.511646	0.523499	-1.04839	0.242839
ATS5s	0.528712	0.509027	-0.903471	0.19146
ATS6s	0.497753	0.530517	-1.22022	0.283905
ATS7s	0.509086	0.511623	-0.464166	0.250188
ATS8s	0.496066	0.497723	-0.28788	0.288168
ATS0Z	0.546909	0.582441	-1.68441	0.134567
ATS1Z	0.521085	0.583149	-1.2109	0.215213
ATS2Z	0.533752	0.504103	-1.3833	0.175641
ATS3Z	0.544792	0.520318	-1.18825	0.140537
ATS4Z	0.522136	0.49538	-0.617736	0.211166
ATS5Z	0.499879	0.567261	-1.39131	0.277721
ATS6Z	0.510424	0.498879	-0.378837	0.246162
ATS7Z	0.50259	0.564398	-0.574473	0.269872
ATS8Z	0.511192	0.533581	-0.656914	0.243634
ATS0m	0.542482	0.576186	-0.66336	0.147626
ATS1m	0.564533	0.530734	-1.69364	0.0786558
ATS2m	0.525079	0.517974	-0.628003	0.202529
ATS3m	0.523968	0.505536	-0.480576	0.206335
ATS4m	0.510386	0.538861	-0.62566	0.246515
ATS5m	0.513512	0.509576	-0.686053	0.237457
ATS6m	0.50803	0.518911	-0.30612	0.253904
ATS7m	0.513413	0.487404	-0.441543	0.23695
ATS8m	0.489918	0.539839	-0.66401	0.30597
ATS0v	0.533591	0.576907	-1.00184	0.176661
ATS1v	0.548694	0.551326	-1.09965	0.127202
ATS2v	0.549744	0.534166	-0.889632	0.125835
ATS3v	0.512634	0.534316	-0.674273	0.239842
ATS4v	0.504039	0.544484	-0.746758	0.265068
ATS5v	0.516795	0.553103	-0.351778	0.227992
ATS6v	0.535074	0.458246	-0.582564	0.172324
ATS7v	0.530019	0.532404	-0.731678	0.187517
ATS8v	0.533026	0.530928	-0.595649	0.177576
ATS0se	0.56112	0.537208	-1.22751	0.0896777
ATS1se	0.526713	0.574059	-1.07614	0.197461
ATS2se	0.546862	0.539127	-1.2588	0.134495
ATS3se	0.52113	0.546403	-1.23889	0.214099
ATS4se	0.520586	0.569656	-0.844179	0.216405
ATS5se	0.533627	0.572324	-0.408546	0.17585
ATS6se	0.51696	0.597384	-1.16025	0.226243
ATS7se	0.557053	0.45232	-0.302024	0.103136
ATS8se	0.540411	0.476916	-1.09258	0.155382
ATS0pe	0.557744	0.542307	-0.880354	0.100138
ATS1pe	0.556595	0.557339	-1.02668	0.101582
ATS2pe	0.53389	0.536767	-0.70257	0.174945
ATS3pe	0.539529	0.512277	-0.6454	0.158176
ATS4pe	0.512624	0.561996	-0.382608	0.240024
ATS5pe	0.548114	0.536302	-1.14255	0.131185
ATS6pe	0.520822	0.565509	-0.528829	0.215419
ATS7pe	0.529311	0.514027	-0.785708	0.189501
ATS8pe	0.504864	0.515026	-0.634346	0.26275
ATS0are	0.550503	0.535096	-0.770382	0.123803
ATS1are	0.545745	0.546324	-1.35622	0.138533
ATS2are	0.551919	0.513167	-0.590971	0.119291
ATS3are	0.531729	0.53613	-0.797692	0.180561
ATS4are	0.548511	0.529022	-0.470483	0.127306
ATS5are	0.545872	0.545063	-1.14453	0.138367
ATS6are	0.537608	0.484897	-0.604512	0.164105
ATS7are	0.514565	0.554239	-0.265936	0.232503
ATS8are	0.528746	0.505825	-0.337186	0.190512
ATS0p	0.551237	0.53833	-0.968609	0.12139
ATS1p	0.546206	0.540576	-0.466476	0.137279
ATS2p	0.5418	0.507459	-1.71314	0.150897
ATS3p	0.542934	0.48792	-0.549122	0.147611
ATS4p	0.528923	0.510754	-0.526384	0.191012
ATS5p	0.521538	0.526623	-0.694694	0.212952
ATS6p	0.514827	0.545011	-0.349495	0.232642
ATS7p	0.522336	0.489587	-0.377004	0.210829
ATS8p	0.537486	0.51045	-0.582016	0.160319
ATS0i	0.536948	0.556353	-0.677963	0.165765
ATS1i	0.535255	0.585601	-1.02483	0.169891
ATS2i	0.54563	0.524002	-2.09532	0.138948
ATS3i	0.5443	0.561801	-0.673238	0.141477
ATS4i	0.541137	0.576774	-0.511543	0.149022
ATS5i	0.540831	0.547146	-1.00404	0.152583
ATS6i	0.540938	0.512742	-0.631238	0.153123
ATS7i	0.541008	0.541895	-1.33526	0.151279
ATS8i	0.49811	0.534354	-0.659862	0.282815
AATS0dv	0.591691	0.580094	-0.474462	-0.0134193
AATS1dv	0.607944	0.530111	-0.872906	-0.0682447
AATS2dv	0.59495	0.542413	-0.627233	-0.0237818
AATS3dv	0.576845	0.580623	-0.797278	0.0371387
AATS4dv	0.556421	0.558357	-0.843698	0.104274
AATS5dv	0.554142	0.555422	-6.03696	0.110885
AATS6dv	0.572115	0.567275	-0.318427	0.0528863
AATS7dv	0.588256	0.537724	-0.764814	-0.00175749
AATS8dv	0.615938	0.524254	-1.20066	-0.0965147
AATS0d	0.588002	0.55166	-0.369715	-0.000155674
AATS1d	0.606332	0.53277	-0.421295	-0.0625629
AATS2d	0.565264	0.575515	-1.01945	0.0751572
AATS3d	0.562505	0.544947	-0.600627	0.084036
AATS4d	0.571161	0.562826	-0.995765	0.0557185
AATS5d	0.561732	0.526572	-0.642761	0.0878814
AATS6d	0.57389	0.544396	-0.625579	0.0471996
AATS7d	0.574956	0.570724	-0.870669	0.0436762
AATS8d	0.598239	0.562866	-0.683309	-0.0361193
AATS0s	0.589472	0.567148	-1.7379	-0.00627927
AATS1s	0.598684	0.564737	-0.507198	-0.0365304
AATS2s	0.586255	0.587877	-0.956471	0.00663093
AATS3s	0.592965	0.576417	-0.291701	-0.017044
AATS4s	0.609399	0.534245	-1.40966	-0.0733413
AATS5s	0.587272	0.607913	-1.65862	0.00133426
AATS6s	0.566988	0.579008	-8.78347	0.0700727
AATS7s	0.55108	0.593136	-0.62211	0.12217
AATS8s	0.58516	0.547102	-1.61681	0.0101015
AATS0Z	0.590072	0.593107	-0.671564	-0.00738988
AATS1Z	0.604614	0.556897	-0.464353	-0.0576
AATS2Z	0.599763	0.555695	-0.795939	-0.0409694
AATS3Z	0.587981	0.588302	-0.853509	8.48374e-05
AATS4Z	0.591032	0.577734	-0.46501	-0.0107363
AATS5Z	0.555624	0.573683	-0.651302	0.107138
AATS6Z	0.553685	0.536389	-0.926827	0.113362
AATS7Z	0.559975	0.563303	-0.0716856	0.0922105
AATS8Z	0.59883	0.567523	-0.514065	-0.0372395
AATS0m	0.603043	0.554454	-0.640632	-0.0519573
AATS1m	0.598375	0.563385	-0.567691	-0.0358987
AATS2m	0.578416	0.607873	-0.621457	0.031974
AATS3m	0.602633	0.550972	-0.438736	-0.0497005
AATS4m	0.588516	0.586152	-0.422921	-0.00207233
AATS5m	0.575479	0.528984	-0.793049	0.0422719
AATS6m	0.536484	0.5629	-0.432674	0.167769
AATS7m	0.565067	0.56485	-0.570607	0.0761779
AATS8m	0.592704	0.578892	-0.433666	-0.015813
AATS0v	0.587723	0.587238	-0.365015	4.86998e-05
AATS1v	0.596222	0.575038	-0.63524	-0.0283365
AATS2v	0.601745	0.558835	-1.01419	-0.0474406
AATS3v	0.571081	0.596077	-0.531928	0.056187
AATS4v	0.593253	0.570947	-0.632228	-0.0179673
AATS5v	0.582229	0.542232	-0.486578	0.0197286
AATS6v	0.553569	0.616324	-2.4107	0.113757
AATS7v	0.575299	0.581982	-0.593967	0.0423828
AATS8v	0.599852	0.57056	-0.432239	-0.0411213
AATS0se	0.598875	0.55922	-0.69184	-0.0383341
AATS1se	0.602879	0.553873	-0.798631	-0.0517652
AATS2se	0.59669	0.570287	-0.413051	-0.0296172
AATS3se	0.575849	0.618108	-0.439549	0.0413087
AATS4se	0.586581	0.599371	-0.84639	0.00435119
AATS5se	0.608458	0.537789	-0.593153	-0.0704842
AATS6se	0.554869	0.61126	-0.354329	0.110152
AATS7se	0.565015	0.55492	-0.863571	0.0769228
AATS8se	0.602635	0.543253	-0.885861	-0.0503376
AATS0pe	0.599098	0.56095	-0.599894	-0.0381382
AATS1pe	0.591797	0.5802	-0.582723	-0.0134271
AATS2pe	0.617182	0.526724	-1.10305	-0.100934
AATS3pe	0.599818	0.558086	-0.611281	-0.0407636
AATS4pe	0.597617	0.57183	-1.04795	-0.033296
AATS5pe	0.576296	0.579307	-0.761205	0.0377738
AATS6pe	0.558502	0.55457	-6.01955	0.0984046
AATS7pe	0.539837	0.535957	-2.42186	0.157039
AATS8pe	0.573282	0.579414	-0.835342	0.0492871
AATS0are	0.607647	0.536517	-0.391487	-0.0671855
AATS1are	0.585134	0.600463	-0.85714	0.00993579
AATS2are	0.590152	0.580251	-0.677617	-0.00819398
AATS3are	0.586185	0.604203	-0.602079	0.00581956
AATS4are	0.58334	0.611433	-0.792417	0.0159499
AATS5are	0.610642	0.521484	-1.33661	-0.0777268
AATS6are	0.552791	0.56732	-3.35405	0.115973
AATS7are	0.546211	0.508887	-1.0022	0.137245
AATS8are	0.579757	0.566352	-0.939611	0.0279368
AATS0p	0.604543	0.549389	-0.609747	-0.0568434
AATS1p	0.600846	0.558458	-0.441337	-0.0448589
AATS2p	0.592691	0.579164	-0.656747	-0.0163838
AATS3p	0.577902	0.573535	-0.92851	0.0327482
AATS4p	0.595579	0.573259	-0.447284	-0.0269357
AATS5p	0.591547	0.552166	-0.556629	-0.0119548
AATS6p	0.578204	0.582093	-0.517096	0.0329574
AATS7p	0.58954	0.553471	-1.09848	-0.00514801
AATS8p	0.590672	0.584574	-0.358713	-0.0093813
AATS0i	0.573585	0.584604	-0.543038	0.0480643
AATS1i	0.621724	0.520286	-0.874042	-0.117196
AATS2i	0.597828	0.544505	-1.29875	-0.0337345
AATS3i	0.594236	0.574263	-0.731133	-0.0211906
AATS4i	0.591049	0.583122	-0.653209	-0.0104548
AATS5i	0.586968	0.595168	-1.21268	0.00367142
AATS6i	0.566299	0.639631	-0.27938	0.0730936
AATS7i	0.589569	0.576272	-1.14956	-0.00533279
AATS8i	0.57458	0.624275	-0.354378	0.0457548
ATSC0c	0.586152	0.564438	-1.27254	0.00650293
ATSC1c	0.501889	0.482877	-1.08322	0.271753
ATSC2c	0.508681	0.509653	-1.11041	0.251226
ATSC3c	0.552253	0.560907	-0.587333	0.117872
ATSC4c	0.573716	0.541232	-0.654512	0.04744
ATSC5c	0.571801	0.5559	-0.313467	0.0536723
ATSC6c	0.584067	0.599362	-0.523901	0.0136774
ATSC7c	0.576526	0.621345	-0.388429	0.039334
ATSC8c	0.585267	0.582028	-0.891412	0.00960602
ATSC0dv	0.558686	0.545413	-0.855969	0.0963584
ATSC1dv	0.531708	0.477192	-1.18423	0.181531
ATSC2dv	0.469895	0.470287	-1.85355	0.361554
ATSC3dv	0.561574	0.543236	-0.559787	0.0831049
ATSC4dv	0.517555	0.561804	-0.244134	0.225356
ATSC5dv	0.56727	0.592839	-0.406946	0.0684184
ATSC6dv	0.564499	0.54495	-1.10045	0.078098
ATSC7dv	0.543541	0.565235	-1.18249	0.143921
ATSC8dv	0.551948	0.584121	-0.622393	0.117586
ATSC0d	0.519512	0.512456	-1.0921	0.219068
ATSC1d	0.545246	0.459855	-1.3253	0.140463
ATSC2d	0.479903	0.489524	-1.08143	0.334006
ATSC3d	0.516939	0.55254	-1.15296	0.227411
ATSC4d	0.56948	0.58235	-0.296428	0.0620161
ATSC5d	0.582316	0.54307	-0.403602	0.0198149
ATSC6d	0.527438	0.532983	-0.589723	0.195019
ATSC7d	0.492626	0.574152	-0.567681	0.298573
ATSC8d	0.542022	0.57195	-1.16871	0.15028
ATSC0s	0.529085	0.533834	-2.03123	0.19044
ATSC1s	0.475658	0.44779	-0.536068	0.3459
ATSC2s	0.427192	0.449604	-0.650239	0.472197
ATSC3s	0.599254	0.584941	-1.5309	-0.0409955
ATSC4s	0.580759	0.594573	-0.809964	0.0244043
ATSC5s	0.590808	0.581983	-0.856932	-0.00991367
ATSC6s	0.606498	0.57078	-0.954745	-0.0637802
ATSC7s	0.595501	0.569537	-0.650497	-0.0256119
ATSC8s	0.583726	0.577147	-0.455639	0.0144949
ATSC0Z	0.562311	0.566124	-0.976295	0.0858925
ATSC1Z	0.58537	0.558015	-0.781168	0.00735283
ATSC2Z	0.477967	0.506618	-0.416131	0.339643
ATSC3Z	0.60117	0.571654	-0.583142	-0.0461126
ATSC4Z	0.505332	0.603727	-0.441965	0.261946
ATSC5Z	0.600776	0.539354	-0.451307	-0.0438611
ATSC6Z	0.590269	0.587091	-1.64684	-0.00736392
ATSC7Z	0.543695	0.5564	-0.741881	0.144901
ATSC8Z	0.58141	0.560883	-0.425665	0.0226621
ATSC0m	0.551676	0.597212	-0.542572	0.119133
ATSC1m	0.577563	0.563701	-0.586947	0.0347974
ATSC2m	0.489447	0.483098	-0.465517	0.306357
ATSC3m	0.594037	0.581267	-0.779147	-0.0211345
ATSC4m	0.530299	0.569459	-0.430204	0.187141
ATSC5m	0.572443	0.563468	-0.656252	0.052259
ATSC6m	0.573958	0.623817	-0.430505	0.0478663
ATSC7m	0.53436	0.528775	-0.539968	0.173398
ATSC8m	0.573335	0.604739	-0.435608	0.049775
ATSC0v	0.54413	0.574204	-1.34802	0.143522
ATSC1v	0.578496	0.534735	-0.501085	0.0324929
ATSC2v	0.546482	0.520247	-0.746448	0.133599
ATSC3v	0.5987	0.580742	-0.624635	-0.0367723
ATSC4v	0.51075	0.589945	-1.22149	0.246034
ATSC5v	0.575504	0.596303	-0.910599	0.0260148
ATSC6v	0.560727	0.615444	-0.628936	0.0910611
ATSC7v	0.503645	0.516838	-0.643959	0.266468
ATSC8v	0.574172	0.571746	-0.31114	0.0461479
ATSC0se	0.579056	0.56766	-0.820959	0.0302478
ATSC1se	0.420844	0.433322	-0.564993	0.487955
ATSC2se	0.481702	0.475874	-0.565932	0.328079
ATSC3se	0.562171	0.598374	-0.849178	0.0855784
ATSC4se	0.59835	0.564998	-0.421942	-0.0359291
ATSC5se	0.589259	0.582535	-1.02348	-0.0039331
ATSC6se	0.590778	0.588763	-0.400254	-0.010774
ATSC7se	0.591937	0.567808	-0.550181	-0.0135274
ATSC8se	0.567358	0.562276	-0.485891	0.0680165
ATSC0pe	0.561228	0.574697	-0.882629	0.0892793
ATSC1pe	0.463426	0.462345	-0.780246	0.379015
ATSC2pe	0.450358	0.457036	-0.43386	0.413137
ATSC3pe	0.583583	0.560867	-1.26548	0.0150949
ATSC4pe	0.586795	0.563562	-0.65051	0.00384872
ATSC5pe	0.573319	0.611074	-0.382568	0.0499574
ATSC6pe	0.597545	0.569132	-1.0769	-0.0328016
ATSC7pe	0.584582	0.540445	-0.408621	0.0120257
ATSC8pe	0.562801	0.58353	-2.02293	0.083723
ATSC0are	0.549456	0.600886	-0.595855	0.127112
ATSC1are	0.447999	0.428047	-0.535527	0.418861
ATSC2are	0.459113	0.448898	-0.673121	0.390111
ATSC3are	0.582112	0.555475	-0.342448	0.0193881
ATSC4are	0.560683	0.62635	-0.775829	0.0914041
ATSC5are	0.597866	0.551625	-0.516664	-0.034509
ATSC6are	0.592653	0.580203	-0.695929	-0.0165636
ATSC7are	0.575004	0.597989	-0.472745	0.0442693
ATSC8are	0.577452	0.57061	-0.948977	0.0349144
ATSC0p	0.513449	0.612264	-0.665739	0.237949
ATSC1p	0.583249	0.60498	-0.871157	0.0158089
ATSC2p	0.550003	0.503944	-1.04843	0.124438
ATSC3p	0.606298	0.560492	-0.66515	-0.0624449
ATSC4p	0.523142	0.603632	-0.47181	0.209001
ATSC5p	0.580818	0.578384	-1.1626	0.0244903
ATSC6p	0.546248	0.573017	-0.609714	0.137212
ATSC7p	0.491776	0.476185	-0.153908	0.300837
ATSC8p	0.580306	0.580358	-0.895805	0.0266362
ATSC0i	0.493168	0.519	-2.38405	0.296636
ATSC1i	0.511627	0.46967	-2.19164	0.243077
ATSC2i	0.483096	0.495457	-0.967054	0.324845
ATSC3i	0.585566	0.604036	-0.623642	0.00781611
ATSC4i	0.559431	0.626788	-0.670011	0.0954574
ATSC5i	0.571392	0.571326	-0.985163	0.0563688
ATSC6i	0.534917	0.470094	-0.973066	0.172818
ATSC7i	0.508897	0.466703	-0.385009	0.251043
ATSC8i	0.528545	0.526926	-0.775755	0.19176
AATSC0c	0.610028	0.535571	-0.703004	-0.0757957
AATSC1c	0.528716	0.471542	-1.19847	0.191482
AATSC2c	0.532975	0.511292	-0.524196	0.177988
AATSC3c	0.566746	0.534862	-0.860611	0.0706301
AATSC4c	0.57242	0.618598	-1.85736	0.0529711
AATSC5c	0.593059	0.554274	-0.362494	-0.0181112
AATSC6c	0.578852	0.608785	-0.650074	0.0309809
AATSC7c	0.565938	0.639541	-0.656494	0.0742956
AATSC8c	0.584688	0.599984	-0.59201	0.0100929
AATSC0dv	0.583903	0.5868	-0.771579	0.0141411
AATSC1dv	0.525073	0.53775	-0.985126	0.202042
AATSC2dv	0.503111	0.43296	-0.188652	0.268028
AATSC3dv	0.575068	0.596769	-0.445822	0.044006
AATSC4dv	0.570553	0.577045	-0.510943	0.0585522
AATSC5dv	0.603446	0.547709	-0.203332	-0.0532036
AATSC6dv	0.581389	0.59367	-0.597853	0.0219635
AATSC7dv	0.564406	0.590374	-0.881014	0.0785714
AATSC8dv	0.604307	0.540555	-0.745502	-0.0560422
AATSC0d	0.475027	0.469649	-0.373947	0.347055
AATSC1d	0.530918	0.50619	-0.583248	0.183331
AATSC2d	0.547595	0.496626	-0.437166	0.133061
AATSC3d	0.568305	0.581463	-1.1508	0.0624339
AATSC4d	0.594012	0.575395	-1.42283	-0.0198232
AATSC5d	0.583229	0.597283	-0.592316	0.0163135
AATSC6d	0.565858	0.554728	-1.60723	0.0738157
AATSC7d	0.555984	0.545692	-0.776908	0.106271
AATSC8d	0.586605	0.58851	-0.669431	0.00495725
AATSC0s	0.584589	0.574454	-0.95104	0.0112002
AATSC1s	0.524317	0.553933	-3.87128	0.205205
AATSC2s	0.461112	0.447127	-2.56288	0.385397
AATSC3s	0.604809	0.547692	-0.30602	-0.0577044
AATSC4s	0.602794	0.549378	-0.385804	-0.0507483
AATSC5s	0.607387	0.557645	-0.877304	-0.0670231
AATSC6s	0.598429	0.581042	-0.405327	-0.0357655
AATSC7s	0.59251	0.58532	-0.552783	-0.0164244
AATSC8s	0.559432	0.573086	-0.87006	0.0945943
AATSC0Z	0.572619	0.634194	-0.538933	0.0522741
AATSC1Z	0.589174	0.587083	-0.502035	-0.00396309
AATSC2Z	0.524663	0.536722	-0.515196	0.203407
AATSC3Z	0.603048	0.553973	-0.460047	-0.0522457
AATSC4Z	0.589199	0.546399	-0.32981	-0.00338837
AATSC5Z	0.593025	0.58007	-0.495633	-0.0174123
AATSC6Z	0.592101	0.58781	-0.702597	-0.0144179
AATSC7Z	0.567297	0.527384	-1.32826	0.0684156
AATSC8Z	0.595399	0.568346	-1.09638	-0.0251514
AATSC0m	0.618893	0.51099	-0.179358	-0.107051
AATSC1m	0.603079	0.555743	-0.32138	-0.0520904
AATSC2m	0.52902	0.5118	-2.37928	0.19061
AATSC3m	0.602814	0.550596	-0.602239	-0.0513079
AATSC4m	0.577714	0.540111	-0.603026	0.0347817
AATSC5m	0.598181	0.564935	-0.428052	-0.0356672
AATSC6m	0.578436	0.616856	-1.21874	0.0322905
AATSC7m	0.563007	0.542108	-0.612323	0.0826434
AATSC8m	0.582878	0.595798	-1.59716	0.0171444
AATSC0v	0.58788	0.570321	-1.00903	3.35891e-05
AATSC1v	0.595178	0.575288	-0.776538	-0.0252389
AATSC2v	0.564319	0.556176	-0.889372	0.0784585
AATSC3v	0.595047	0.555418	-0.380947	-0.0244648
AATSC4v	0.577977	0.534626	-1.64023	0.0322524
AATSC5v	0.588594	0.595895	-0.454132	-0.00251882
AATSC6v	0.577657	0.585732	-0.318438	0.0350588
AATSC7v	0.519471	0.561084	-0.829242	0.219829
AATSC8v	0.585779	0.585331	-0.359608	0.00695647
AATSC0se	0.587692	0.579579	-0.621267	0.000253356
AATSC1se	0.465033	0.435474	-1.51791	0.374791
AATSC2se	0.514208	0.510697	-1.19644	0.235068
AATSC3se	0.576192	0.582781	-0.587608	0.0388478
AATSC4se	0.57809	0.610948	-0.634704	0.03244
AATSC5se	0.579609	0.600386	-0.646367	0.027614
AATSC6se	0.577352	0.617734	-0.389448	0.0347763
AATSC7se	0.588047	0.598278	-0.362831	-0.00102985
AATSC8se	0.579466	0.600342	-0.762027	0.028881
AATSC0pe	0.574251	0.58713	-0.651274	0.0454605
AATSC1pe	0.461486	0.485968	-0.827649	0.383011
AATSC2pe	0.484981	0.475969	-1.20052	0.319612
AATSC3pe	0.565107	0.618616	-1.29816	0.0769195
AATSC4pe	0.594862	0.568143	-0.427039	-0.0242652
AATSC5pe	0.581828	0.591715	-0.537152	0.0205215
AATSC6pe	0.592476	0.578043	-0.31442	-0.0146998
AATSC7pe	0.594721	0.567158	-0.69842	-0.0232897
AATSC8pe	0.586166	0.597805	-0.398698	0.00528849
AATSC0are	0.590051	0.561563	-0.653051	-0.00789492
AATSC1are	0.467982	0.431163	-0.701484	0.365721
AATSC2are	0.487934	0.483255	-0.678829	0.31039
AATSC3are	0.562401	0.629159	-0.779832	0.0858247
AATSC4are	0.602944	0.553115	-0.232482	-0.0507745
AATSC5are	0.585013	0.59744	-1.34861	0.00949264
AATSC6are	0.590502	0.583956	-0.298118	-0.00886035
AATSC7are	0.584368	0.615287	-1.37788	0.0117888
AATSC8are	0.592065	0.568613	-0.740785	-0.0149683
AATSC0p	0.58345	0.571266	-0.544296	0.0149897
AATSC1p	0.576047	0.576793	-0.372912	0.0393346
AATSC2p	0.559674	0.559119	-1.79304	0.0938332
AATSC3p	0.57554	0.566646	-0.416166	0.0412007
AATSC4p	0.579668	0.595241	-0.544965	0.0280041
AATSC5p	0.598607	0.566635	-1.22394	-0.0364821
AATSC6p	0.550631	0.578414	-0.476747	0.122743
AATSC7p	0.547351	0.48642	-0.362228	0.133945
AATSC8p	0.539143	0.648329	-0.395069	0.133807
AATSC0i	0.519385	0.537931	-10.2838	0.219438
AATSC1i	0.504631	0.538436	-0.528728	0.263293
AATSC2i	0.500836	0.515376	-1.23539	0.274504
AATSC3i	0.597289	0.565229	-0.774528	-0.0323917
AATSC4i	0.594468	0.587098	-0.530093	-0.0230401
AATSC5i	0.582306	0.618462	-1.10201	0.0193231
AATSC6i	0.549062	0.498428	-0.736384	0.128368
AATSC7i	0.547642	0.550684	-0.72559	0.132783
AATSC8i	0.611655	0.499451	-0.653462	-0.0813017
MATS1c	0.448337	0.445202	-1.62944	0.418347
MATS2c	0.481593	0.488094	-1.57046	0.328798
MATS3c	0.545182	0.553533	-0.52216	0.139909
MATS4c	0.610866	0.53538	-0.573971	-0.0791954
MATS5c	0.591235	0.558651	-0.846042	-0.011644
MATS6c	0.605729	0.556594	-0.696005	-0.0615564
MATS7c	0.5907	0.582128	-0.194817	-0.00931772
MATS8c	0.578995	0.605732	-0.462465	0.0293418
MATS1dv	0.519122	0.539999	-0.738558	0.220491
MATS2dv	0.48888	0.490466	-1.06911	0.308367
MATS3dv	0.566127	0.581804	-0.713604	0.0735231
MATS4dv	0.555391	0.572668	-0.744102	0.105105
MATS5dv	0.578446	0.60478	-0.637288	0.0328526
MATS6dv	0.582084	0.590983	-0.357794	0.0190543
MATS7dv	0.574328	0.554893	-0.983202	0.0457435
MATS8dv	0.586102	0.587782	-1.01417	0.00679625
MATS1d	0.582607	0.565168	-0.636932	0.0180816
MATS2d	0.557203	0.551227	-0.779411	0.102434
MATS3d	0.565551	0.610365	-0.21593	0.0752969
MATS4d	0.572683	0.591714	-0.676373	0.0517897
MATS5d	0.598676	0.570983	-0.545739	-0.0361708
MATS6d	0.565926	0.575335	-0.767392	0.0736811
MATS7d	0.558789	0.557085	-0.528769	0.0967584
MATS8d	0.594899	0.576125	-0.459311	-0.0241661
MATS1s	0.57938	0.591871	-0.828591	0.0281918
MATS2s	0.440771	0.449476	-0.606148	0.438038
MATS3s	0.584431	0.581389	-1.01851	0.0123443
MATS4s	0.585561	0.579394	-0.758104	0.00758691
MATS5s	0.598416	0.55743	-0.538849	-0.0359616
MATS6s	0.596372	0.575149	-0.550398	-0.0288816
MATS7s	0.59687	0.563383	-0.952358	-0.0310886
MATS8s	0.566331	0.620876	-0.407365	0.0728559
MATS1Z	0.594813	0.572972	-0.643491	-0.023578
MATS2Z	0.508995	0.485001	-0.496667	0.250571
MATS3Z	0.610262	0.535291	-0.835266	-0.0765257
MATS4Z	0.563866	0.557496	-1.21652	0.0791808
MATS5Z	0.590125	0.582026	-0.446277	-0.00763492
MATS6Z	0.57843	0.61135	-0.619857	0.0323206
MATS7Z	0.56181	0.535213	-0.500098	0.0873735
MATS8Z	0.578374	0.588331	-0.449123	0.0306374
MATS1m	0.584984	0.596562	-0.562763	0.0100572
MATS2m	0.510103	0.492916	-1.45721	0.247239
MATS3m	0.598724	0.562545	-0.460091	-0.0378499
MATS4m	0.580932	0.549486	-0.534114	0.0215131
MATS5m	0.617442	0.514682	-0.463492	-0.101859
MATS6m	0.585293	0.596617	-0.591251	0.00890014
MATS7m	0.541284	0.57981	-0.682463	0.15307
MATS8m	0.589803	0.570392	-0.701273	-0.00606489
MATS1v	0.614758	0.528524	-0.613924	-0.092392
MATS2v	0.592951	0.486661	-1.43789	-0.0163928
MATS3v	0.573834	0.599666	-0.727959	0.0474341
MATS4v	0.572095	0.620502	-0.363739	0.0540449
MATS5v	0.59861	0.572558	-0.25422	-0.0366128
MATS6v	0.574999	0.577675	-0.876109	0.0431397
MATS7v	0.531684	0.532498	-0.280726	0.182787
MATS8v	0.581562	0.582987	-0.459639	0.022028
MATS1se	0.476399	0.449801	-1.89343	0.343771
MATS2se	0.50056	0.477666	-0.619486	0.275403
MATS3se	0.595292	0.571436	-1.24894	-0.0255912
MATS4se	0.582772	0.593669	-0.752277	0.0174961
MATS5se	0.581126	0.599329	-0.761909	0.0239024
MATS6se	0.598137	0.560222	-0.876351	-0.0351005
MATS7se	0.601366	0.560521	-0.758134	-0.0461886
MATS8se	0.58997	0.57734	-0.477908	-0.00710044
MATS1pe	0.47201	0.44261	-0.389221	0.355058
MATS2pe	0.473711	0.471018	-0.550126	0.350265
MATS3pe	0.604682	0.542813	-0.610261	-0.0583021
MATS4pe	0.572043	0.589754	-0.793791	0.0539425
MATS5pe	0.605618	0.542148	-0.441097	-0.0609245
MATS6pe	0.597729	0.566071	-0.613173	-0.0338385
MATS7pe	0.582073	0.592701	-1.55329	0.0192996
MATS8pe	0.59044	0.576486	-0.505751	-0.00882641
MATS1are	0.468595	0.456201	-0.211179	0.364876
MATS2are	0.4846	0.443701	-0.828729	0.320004
MATS3are	0.589859	0.575595	-0.5401	-0.00660653
MATS4are	0.584819	0.582027	-1.22497	0.00890346
MATS5are	0.589651	0.599718	-0.634777	-0.00610393
MATS6are	0.589803	0.576763	-0.520757	-0.00586454
MATS7are	0.587994	0.588643	-0.408914	-0.00117736
MATS8are	0.590866	0.578889	-0.623517	-0.00970162
MATS1p	0.590102	0.540753	-1.01062	-0.00740833
MATS2p	0.583469	0.53645	-0.357874	0.0154316
MATS3p	0.581543	0.581706	-0.415062	0.0220901
MATS4p	0.587641	0.477111	-0.812628	-0.0151877
MATS5p	0.612229	0.55992	-1.45389	-0.0833317
MATS6p	0.571526	0.531267	-0.606626	0.0542096
MATS7p	0.535352	0.506722	-0.768742	0.171612
MATS8p	0.592007	0.577232	-0.602434	-0.013498
MATS1i	0.520886	0.560207	-1.68683	0.21479
MATS2i	0.538252	0.519315	-0.983871	0.162436
MATS3i	0.59412	0.573657	-0.480606	-0.02064
MATS4i	0.598258	0.574863	-0.35532	-0.0346653
MATS5i	0.598246	0.561982	-0.4987	-0.0360463
MATS6i	0.5468	0.518925	-0.425383	0.135439
MATS7i	0.540457	0.564603	-0.457548	0.154796
MATS8i	0.570429	0.577375	-0.730128	0.0582901
GATS1c	0.449778	0.45503	-2.11571	0.414471
GATS2c	0.574868	0.573045	-0.958305	0.0445266
GATS3c	0.563712	0.540612	-1.2669	0.0810587
GATS4c	0.563272	0.625974	-0.419886	0.0828876
GATS5c	0.59233	0.579403	-0.450432	-0.0152395
GATS6c	0.610856	0.505323	-1.05344	-0.0785612
GATS7c	0.586564	0.588818	-0.601979	0.00395458
GATS8c	0.593745	0.546908	-0.522874	-0.0194696
GATS1dv	0.507886	0.517628	-0.838828	0.254034
GATS2dv	0.533976	0.527707	-1.10801	0.174928
GATS3dv	0.560454	0.580667	-0.666998	0.0908605
GATS4dv	0.572152	0.556925	-0.745958	0.0515801
GATS5dv	0.583069	0.602575	-0.661917	0.0160635
GATS6dv	0.564463	0.527163	-0.5958	0.0771373
GATS7dv	0.600207	0.508773	-0.40623	-0.0412538
GATS8dv	0.577145	0.596355	-0.740285	0.0362463
GATS1d	0.581363	0.605012	-0.574781	0.0231274
GATS2d	0.602011	0.544656	-0.699349	-0.0488084
GATS3d	0.59244	0.422148	-0.642851	-0.0249075
GATS4d	0.56688	0.630019	-0.546281	0.0707307
GATS5d	0.590432	0.582508	-0.534929	-0.00874362
GATS6d	0.567755	0.550091	-1.50088	0.0673617
GATS7d	0.584112	0.518473	-0.502285	0.0135593
GATS8d	0.581813	0.638948	-0.363705	0.0208679
GATS1s	0.574212	0.525521	-1.02926	0.0465608
GATS2s	0.546474	0.523956	-1.66106	0.136455
GATS3s	0.585496	0.593078	-0.465965	0.00806604
GATS4s	0.591	0.574476	-0.451202	-0.0107497
GATS5s	0.563164	0.594541	-0.986122	0.0822707
GATS6s	0.542999	0.568088	-0.353753	0.147769
GATS7s	0.569649	0.612456	-0.714713	0.061761
GATS8s	0.554334	0.559773	-0.811091	0.110439
GATS1Z	0.596379	0.571486	-0.562524	-0.0289995
GATS2Z	0.480907	0.476934	-3.06225	0.331243
GATS3Z	0.565904	0.659112	-0.44682	0.0744068
GATS4Z	0.571416	0.540499	-0.606527	0.0555352
GATS5Z	0.580847	0.603504	-0.586882	0.0242657
GATS6Z	0.597829	0.575284	-0.632357	-0.0336078
GATS7Z	0.581953	0.563118	-0.401814	0.0197001
GATS8Z	0.581878	0.585932	-0.410834	0.0208636
GATS1m	0.594979	0.57769	-0.539788	-0.0250895
GATS2m	0.463586	0.507835	-0.994159	0.378031
GATS3m	0.570909	0.627974	-0.815318	0.0577689
GATS4m	0.564051	0.597155	-0.526084	0.0800382
GATS5m	0.597159	0.562012	-0.496807	-0.031747
GATS6m	0.592807	0.58836	-1.18484	-0.0164954
GATS7m	0.578084	0.57066	-0.574013	0.0328655
GATS8m	0.581055	0.576525	-0.693445	0.0230888
GATS1v	0.593053	0.573437	-0.514648	-0.0175287
GATS2v	0.565651	0.54663	-0.716459	0.073529
GATS3v	0.582725	0.602311	-1.10425	0.0175647
GATS4v	0.570337	0.570524	-0.907684	0.0582252
GATS5v	0.582817	0.601442	-0.680543	0.0182356
GATS6v	0.560018	0.595806	-0.503881	0.0931276
GATS7v	0.532074	0.550884	-1.30322	0.181539
GATS8v	0.57822	0.575112	-0.649719	0.0326728
GATS1se	0.591279	0.540217	-0.453396	-0.0121483
GATS2se	0.558902	0.562111	-0.496354	0.0965994
GATS3se	0.591737	0.581084	-0.568164	-0.0132583
GATS4se	0.598005	0.565569	-0.523462	-0.0346428
GATS5se	0.596216	0.570172	-0.417105	-0.0277111
GATS6se	0.568761	0.571051	-0.597336	0.0640619
GATS7se	0.587562	0.582511	-0.600549	0.00108701
GATS8se	0.575366	0.598469	-0.420881	0.0416314
GATS1pe	0.580916	0.584206	-0.448142	0.0231017
GATS2pe	0.546814	0.549143	-0.951043	0.135605
GATS3pe	0.588366	0.588553	-0.557386	-0.00117701
GATS4pe	0.59335	0.575897	-0.493872	-0.0195258
GATS5pe	0.609056	0.552161	-1.0495	-0.0728875
GATS6pe	0.579345	0.531283	-0.98568	0.029199
GATS7pe	0.586407	0.588552	-0.565207	0.00545209
GATS8pe	0.58112	0.566286	-0.773725	0.0228901
GATS1are	0.596708	0.557538	-0.684015	-0.0300986
GATS2are	0.557198	0.535799	-0.519257	0.101401
GATS3are	0.591844	0.579658	-0.531474	-0.0137022
GATS4are	0.576892	0.620537	-0.230376	0.0381135
GATS5are	0.58428	0.595835	-0.513322	0.0116076
GATS6are	0.556933	0.567285	-0.910728	0.101851
GATS7are	0.593019	0.573497	-0.844622	-0.0174747
GATS8are	0.594218	0.540111	-0.785773	-0.0209785
GATS1p	0.581433	0.549684	-1.50982	0.0221705
GATS2p	0.552908	0.593291	-1.56221	0.115166
GATS3p	0.580326	0.595489	-0.213743	0.026596
GATS4p	0.578951	0.605356	-0.570622	0.0303359
GATS5p	0.583562	0.606539	-0.392764	0.0149943
GATS6p	0.577047	0.599466	-0.650878	0.0369116
GATS7p	0.552654	0.5214	-0.903858	0.11682
GATS8p	0.564146	0.579265	-1.00914	0.0793401
GATS1i	0.558366	0.590019	-0.782748	0.096663
GATS2i	0.560918	0.523389	-0.977334	0.089809
GATS3i	0.595507	0.573239	-0.429953	-0.025355
GATS4i	0.575214	0.614457	-0.700229	0.042905
GATS5i	0.4892	0.663147	-0.702431	0.279572
GATS6i	0.599011	0.564034	-0.488595	-0.0375753
GATS7i	0.531577	0.535586	-0.714178	0.182084
GATS8i	0.536429	0.515218	-1.2649	0.167359
BCUTc-1h	0.4413	0.39719	-0.758348	0.437003
BCUTc-1l	0.566086	0.531775	-0.730353	0.0734113
BCUTdv-1h	0.478929	0.50648	-0.884763	0.336723
BCUTdv-1l	0.568402	0.561677	-1.20521	0.0656986
BCUTd-1h	0.514006	0.524076	-0.864367	0.235416
BCUTd-1l	0.571739	0.559181	-0.591352	0.0547547
BCUTs-1h	0.471116	0.492148	-0.829845	0.358002
BCUTs-1l	0.581856	0.602532	-0.356442	0.0207737
BCUTZ-1h	0.575736	0.617725	-0.874185	0.0419329
BCUTZ-1l	0.429151	0.387248	-0.894044	0.467433
BCUTm-1h	0.569515	0.629485	-0.40998	0.0625495
BCUTm-1l	0.419856	0.419329	-2.96324	0.489958
BCUTv-1h	0.430846	0.447908	-0.510756	0.46307
BCUTv-1l	0.528986	0.512309	-0.878058	0.189823
BCUTse-1h	0.491438	0.515604	-4.39262	0.301132
BCUTse-1l	0.446789	0.482681	-0.388305	0.423049
BCUTpe-1h	0.466893	0.46888	-1.60467	0.369807
BCUTpe-1l	0.432158	0.421964	0.113307	0.460216
BCUTare-1h	0.451245	0.500689	-1.1176	0.411043
BCUTare-1l	0.444735	0.421605	-1.32598	0.428247
BCUTp-1h	0.532137	0.502491	-1.42391	0.180589
BCUTp-1l	0.51383	0.46725	-1.09064	0.236713
BCUTi-1h	0.44507	0.460035	-1.14842	0.426791
BCUTi-1l	0.404171	0.438706	-0.793529	0.527562
BalabanJ.1	0.578051	0.553627	-0.884296	0.0333679
SpAbs_DzZ	0.56583	0.57483	-1.39666	0.0732653
SpMax_DzZ	0.587341	0.551222	-0.553955	0.00258117
SpDiam_DzZ	0.584669	0.545474	-1.32112	0.0110292
SpAD_DzZ	0.578057	0.580961	-0.713098	0.0332435
SpMAD_DzZ	0.582304	0.595981	-0.831284	0.0168853
LogEE_DzZ	0.580183	0.543671	-0.577409	0.0264794
SM1_DzZ	0.594319	0.569821	-0.525121	-0.0218949
VE1_DzZ	0.566977	0.540882	-0.899921	0.069852
VE2_DzZ	0.566183	0.559377	-0.575406	0.0723577
VE3_DzZ	0.545732	0.59198	-0.802857	0.138762
VR1_DzZ	0.539579	0.536394	-1.13703	0.157135
VR2_DzZ	0.551223	0.548048	-0.83262	0.121032
VR3_DzZ	0.550307	0.561247	-0.649937	0.123461
SpAbs_Dzm	0.580672	0.554775	-1.09471	0.0233179
SpMax_Dzm	0.580715	0.554615	-0.392843	0.0238757
SpDiam_Dzm	0.58031	0.546577	-1.24748	0.0236615
SpAD_Dzm	0.574289	0.547368	-0.593457	0.0466582
SpMAD_Dzm	0.595156	0.585082	-0.642115	-0.0247233
LogEE_Dzm	0.57896	0.557884	-0.692769	0.0285836
SM1_Dzm	0.583551	0.594318	-1.15231	0.0151484
VE1_Dzm	0.555124	0.538076	-1.39297	0.108433
VE2_Dzm	0.582381	0.493558	-1.8521	0.0197243
VE3_Dzm	0.565089	0.519311	-1.43432	0.0764337
VR1_Dzm	0.532416	0.553124	-1.1299	0.180712
VR2_Dzm	0.54731	0.545211	-0.699153	0.132967
VR3_Dzm	0.557816	0.533342	-1.55265	0.100252
SpAbs_Dzv	0.581846	0.575547	-0.613182	0.0205971
SpMax_Dzv	0.570747	0.587535	-0.856051	0.0579118
SpDiam_Dzv	0.582008	0.548424	-0.467126	0.0191154
SpAD_Dzv	0.568474	0.575953	-1.3823	0.0646758
SpMAD_Dzv	0.584918	0.58221	-1.0003	0.00996482
LogEE_Dzv	0.587259	0.548794	-0.96138	0.00247252
SM1_Dzv	0.617911	0.502994	-0.355266	-0.103535
VE1_Dzv	0.560292	0.535086	-0.733955	0.0924174
VE2_Dzv	0.568267	0.554897	-0.827855	0.0654253
VE3_Dzv	0.557848	0.547685	-0.779422	0.0989034
VR1_Dzv	0.553276	0.560704	-0.718253	0.111594
VR2_Dzv	0.522951	0.58338	-0.615852	0.208835
VR3_Dzv	0.549702	0.556505	-0.798343	0.125517
SpAbs_Dzse	0.564823	0.560566	-0.591135	0.077204
SpMax_Dzse	0.583318	0.549565	-0.8977	0.0164414
SpDiam_Dzse	0.58699	0.536347	-1.18008	0.00284124
SpAD_Dzse	0.597514	0.51803	-0.962689	-0.0321399
SpMAD_Dzse	0.576906	0.605759	-0.396716	0.0372003
LogEE_Dzse	0.575515	0.572508	-1.32177	0.0421824
SM1_Dzse	0.621976	0.519365	-1.81014	-0.118148
VE1_Dzse	0.540496	0.564285	-1.65232	0.155072
VE2_Dzse	0.563397	0.545302	-0.902492	0.0816978
VE3_Dzse	0.548082	0.564356	-0.924709	0.130704
VR1_Dzse	0.542234	0.51372	-0.697228	0.15007
VR2_Dzse	0.548407	0.529177	-0.196335	0.130758
VR3_Dzse	0.553356	0.597624	-1.32681	0.11456
SpAbs_Dzpe	0.57944	0.569983	-0.914843	0.0276153
SpMax_Dzpe	0.56606	0.577832	-0.355781	0.0732622
SpDiam_Dzpe	0.546882	0.609355	-1.93766	0.135588
SpAD_Dzpe	0.57655	0.549949	-0.693782	0.038474
SpMAD_Dzpe	0.592529	0.55467	-0.649487	-0.0161667
LogEE_Dzpe	0.572461	0.582338	-0.54507	0.0510279
SM1_Dzpe	0.586099	0.590714	-0.534867	0.00594557
VE1_Dzpe	0.552947	0.547797	-1.23151	0.115785
VE2_Dzpe	0.563646	0.545011	-1.24236	0.0804251
VE3_Dzpe	0.56619	0.560638	-1.97309	0.0734697
VR1_Dzpe	0.527867	0.556634	-1.14167	0.193726
VR2_Dzpe	0.536905	0.551035	-1.36453	0.16535
VR3_Dzpe	0.560188	0.530244	-1.48952	0.0924323
SpAbs_Dzare	0.573181	0.575305	-1.09678	0.0482778
SpMax_Dzare	0.574332	0.581183	-0.975111	0.0465604
SpDiam_Dzare	0.5861	0.553159	-0.35664	0.00678315
SpAD_Dzare	0.580015	0.54505	-0.90044	0.0266239
SpMAD_Dzare	0.582875	0.593175	-0.701988	0.0177923
LogEE_Dzare	0.574046	0.580731	-1.01687	0.0460584
SM1_Dzare	0.582267	0.594843	-0.673709	0.0195074
VE1_Dzare	0.553948	0.538376	-2.04762	0.112542
VE2_Dzare	0.545806	0.578372	-0.825988	0.138613
VE3_Dzare	0.574472	0.493942	-1.70333	0.0460042
VR1_Dzare	0.587281	0.501939	-0.445892	0.00192976
VR2_Dzare	0.537153	0.539568	-1.5191	0.165236
VR3_Dzare	0.553162	0.54404	-1.00297	0.114898
SpAbs_Dzp	0.567999	0.586826	-1.76847	0.0673482
SpMax_Dzp	0.5772	0.567401	-0.691546	0.0368041
SpDiam_Dzp	0.577311	0.581921	-0.612986	0.0356826
SpAD_Dzp	0.55735	0.611943	-0.970076	0.101845
SpMAD_Dzp	0.591182	0.578568	-0.402373	-0.0101464
LogEE_Dzp	0.571667	0.576871	-2.42775	0.0544969
SM1_Dzp	0.625535	0.51464	-0.948496	-0.130935
VE1_Dzp	0.547334	0.570972	-1.08678	0.133536
VE2_Dzp	0.56567	0.536848	-0.63923	0.0734573
VE3_Dzp	0.558219	0.541209	-0.340069	0.0967819
VR1_Dzp	0.535619	0.5731	-0.37962	0.170348
VR2_Dzp	0.535173	0.548445	-1.57759	0.171569
VR3_Dzp	0.547893	0.552271	-1.22025	0.13152
SpAbs_Dzi	0.575667	0.561113	-0.62084	0.0414329
SpMax_Dzi	0.569089	0.564203	-0.607778	0.0625348
SpDiam_Dzi	0.577434	0.556417	-1.07385	0.0355047
SpAD_Dzi	0.586734	0.513492	-0.21625	0.0050148
SpMAD_Dzi	0.606329	0.530582	-0.426682	-0.0629704
LogEE_Dzi	0.584504	0.565187	-0.489759	0.0116396
SM1_Dzi	0.584581	0.569643	-1.08851	0.0118623
VE1_Dzi	0.563924	0.522487	-0.934626	0.0796609
VE2_Dzi	0.550213	0.578666	-0.837937	0.124296
VE3_Dzi	0.546446	0.5625	-0.758186	0.136123
VR1_Dzi	0.549014	0.513406	-0.660356	0.128432
VR2_Dzi	0.558545	0.508648	-1.23087	0.0982467
VR3_Dzi	0.557359	0.530609	-0.918963	0.10205
BertzCT.1	0.51204	0.508637	-0.67477	0.239734
nBonds	0.558139	0.545374	-0.829739	0.0974976
nBondsO	0.549469	0.548443	-1.38209	0.126198
nBondsS	0.550275	0.528787	-1.49819	0.122776
nBondsD	0.568983	0.53747	-1.17587	0.0633079
nBondsT	0.568026	0.641135	-0.419607	0.0672536
nBondsA	0.579916	0.545533	-1.00482	0.0271686
nBondsM	0.593746	0.502173	-0.843728	-0.0199488
nBondsKS	0.520805	0.586182	-0.416103	0.216057
nBondsKD	0.566757	0.581167	-0.875112	0.0690844
RNCG	0.608931	0.519554	-0.596631	-0.0717429
RPCG	0.46593	0.433089	-0.771898	0.37201
C1SP1	0.581277	0.610685	-0.345256	0.021935
C2SP1	0.53991	0.522237	-1.45875	0.156083
C1SP2	0.608688	0.538106	-0.71717	-0.0708749
C2SP2	0.594579	0.572195	-0.440843	-0.0227311
C3SP2	0.576607	0.589017	-1.06974	0.0390017
C1SP3	0.490613	0.509496	-0.491983	0.304131
C2SP3	0.590958	0.587131	-0.458286	-0.0105716
C3SP3	0.590897	0.585769	-0.672609	-0.0101829
C4SP3	0.499588	0.644594	-0.472828	0.271549
HybRatio	0.564071	0.597614	-0.832985	0.0794029
FCSP3	0.569412	0.583813	-0.75993	0.0616249
Xch-5d	0.578531	0.58071	-0.480013	0.0310926
Xch-6d	0.526956	0.551234	-1.15076	0.196819
Xch-7d	0.503236	0.492382	-0.300077	0.267673
Xch-5dv	0.590299	0.587856	-0.837405	-0.00818596
Xch-6dv	0.548415	0.496853	-4.79177	0.130735
Xch-7dv	0.529534	0.472824	-1.02575	0.189492
Xc-3d	0.506494	0.464124	-0.829959	0.258491
Xc-4d	0.523244	0.483057	-2.84964	0.208132
Xc-5d	0.487521	0.492273	-0.388524	0.312776
Xc-6d	0.501525	0.504302	-0.919713	0.272934
Xc-3dv	0.47447	0.545997	-0.3605	0.321804
Xc-4dv	0.548999	0.582856	-0.330309	0.127806
Xc-5dv	0.522669	0.452396	-0.27551	0.209875
Xc-6dv	0.531431	0.523666	-0.244395	0.183742
Xpc-4d	0.504587	0.471832	-1.02576	0.263522
Xpc-5d	0.488144	0.509914	-1.55922	0.310864
Xpc-6d	0.510164	0.422571	-0.822859	0.247712
Xpc-4dv	0.506333	0.491386	-0.624556	0.258204
Xpc-5dv	0.473802	0.5388	-0.862957	0.35105
Xpc-6dv	0.490346	0.54568	-0.650103	0.302756
Xp-0d	0.533054	0.558458	-2.18338	0.178666
Xp-1d	0.559783	0.547784	-1.46089	0.0911586
Xp-2d	0.523785	0.548219	-1.63423	0.206932
Xp-3d	0.528339	0.538392	-0.856061	0.192854
Xp-4d	0.524247	0.555009	-1.07486	0.204827
Xp-5d	0.497195	0.565428	-0.984282	0.285413
Xp-6d	0.505097	0.516949	-0.48935	0.262181
Xp-7d	0.486637	0.544071	-0.273626	0.315279
AXp-0d	0.594069	0.580948	-0.652135	-0.0244973
AXp-1d	0.541086	0.54653	-0.519287	0.152976
AXp-2d	0.582488	0.556445	-0.216511	0.0180909
AXp-3d	0.539099	0.530027	-0.470931	0.159333
AXp-4d	0.534107	0.528786	-0.620431	0.175019
AXp-5d	0.543204	0.482776	-1.47653	0.146819
AXp-6d	0.523396	0.539936	-0.571978	0.207164
AXp-7d	0.523328	0.506352	-0.142119	0.208437
Xp-0dv	0.555796	0.512016	-0.827707	0.106115
Xp-1dv	0.551285	0.523681	-0.808817	0.121035
Xp-2dv	0.49722	0.559153	-0.0842841	0.285408
Xp-3dv	0.539459	0.520933	-0.439508	0.156904
Xp-4dv	0.525821	0.491959	-0.839002	0.200245
Xp-5dv	0.493608	0.549535	-0.676224	0.279007
Xp-6dv	0.52158	0.499266	-0.413399	0.213685
Xp-7dv	0.493883	0.567959	-0.933346	0.294886
AXp-0dv	0.582646	0.584146	-1.01906	0.016734
AXp-1dv	0.588456	0.586846	-0.692562	-0.00178005
AXp-2dv	0.603821	0.549644	-0.480973	-0.054171
AXp-3dv	0.598642	0.571551	-0.868586	-0.0361208
AXp-4dv	0.573438	0.602115	-0.404831	0.0485103
AXp-5dv	0.567908	0.569197	-0.636111	0.0668801
AXp-6dv	0.593388	0.536606	-0.456785	-0.0188064
AXp-7dv	0.576693	0.571382	-0.754785	0.0373516
SZ	0.542415	0.540725	-1.21484	0.148275
Sm	0.574306	0.49995	-1.82312	0.0466788
Sv	0.540313	0.544236	-0.939024	0.153248
Sse	0.548417	0.542296	-1.24771	0.128757
Spe	0.535932	0.568414	-0.802811	0.16967
Sare	0.563836	0.53987	-0.633675	0.0788136
Sp	0.523204	0.623192	-0.576419	0.208127
Si	0.547002	0.580235	-0.343521	0.129995
MZ	0.587405	0.592071	-0.501843	0.00213094
Mm	0.570078	0.63493	-0.386497	0.060668
Mv	0.597375	0.572249	-0.811214	-0.0326657
Mse	0.578419	0.609457	-0.728563	0.0322629
Mpe	0.585738	0.588282	-0.460339	0.00746706
Mare	0.597425	0.568931	-0.59334	-0.0329191
Mp	0.59074	0.591646	-1.007	-0.00915428
Mi	0.585507	0.591559	-0.542082	0.00850667
SpAbs_D	0.559173	0.579116	-0.791879	0.0962821
SpMax_D	0.576213	0.571673	-0.684413	0.0387628
SpDiam_D	0.576723	0.564735	-0.327158	0.0371535
SpAD_D	0.550552	0.585368	-1.35813	0.122683
SpMAD_D	0.595196	0.570519	-0.753398	-0.0244013
LogEE_D	0.580315	0.55097	-0.954965	0.025944
VE1_D	0.560848	0.53242	-0.504892	0.0895579
VE2_D	0.585166	0.49139	-1.2405	0.0103254
VE3_D	0.555299	0.56152	-0.0990938	0.108348
VR1_D	0.545881	0.552167	-1.53344	0.137126
VR2_D	0.553194	0.517452	-0.74182	0.115469
VR3_D	0.531763	0.593544	-1.52934	0.182505
NssssB	0.414997	0.416312	-2.5879	0.502019
NsCH3	0.555045	0.497715	-0.431457	0.108311
NssCH2	0.599975	0.56839	-0.386106	-0.0419122
NdsCH	0.580989	0.609202	-0.540108	0.0233776
NaaCH	0.591681	0.580889	-0.581862	-0.0125738
NsssCH	0.580073	0.605854	-0.690042	0.0264255
NtsC	0.593797	0.573767	-0.500792	-0.0201827
NdssC	0.399515	0.434454	-0.859949	0.538623
NaasC	0.598234	0.562235	-0.414656	-0.0359071
NaaaC	0.560886	0.522121	-0.270452	0.0905019
NssssC	0.550343	0.549184	-0.343002	0.119188
NtN	0.590913	0.577954	-0.701894	-0.0103948
NaaN	0.583336	0.60078	-0.67855	0.015438
NsssN	0.592631	0.570353	-0.642551	-0.0156947
NaasN	0.572069	0.54411	-2.28973	0.0538094
NdO	0.597338	0.568766	-0.701735	-0.0324233
NssO	0.60506	0.548926	-0.508816	-0.0581475
NsF	0.533716	0.51478	-10.5837	0.17641
NssS	0.569532	0.550177	-1.07163	0.0612805
NaaS	0.588903	0.592564	-0.70869	-0.00279498
NddssS	0.583979	0.600267	-0.541029	0.0135014
SssssB	0.415522	0.39627	-0.972868	0.500374
SsCH3	0.543981	0.51942	-0.583949	0.141516
SssCH2	0.569923	0.631258	-0.562042	0.0610554
SdsCH	0.593377	0.572965	-0.670622	-0.0178927
SaaCH	0.59867	0.578503	-1.47139	-0.0366432
SsssCH	0.59016	0.583932	-0.626766	-0.00687703
StsC	0.583216	0.568969	-0.539458	0.0157953
SdssC	0.44688	0.451851	-1.46454	0.422455
SaasC	0.60529	0.550137	-0.729574	-0.0593912
SaaaC	0.553303	0.502998	-1.19291	0.114416
SssssC	0.546484	0.541123	-0.510411	0.136635
StN	0.589137	0.588513	-0.379433	-0.00432294
SaaN	0.565725	0.645719	-0.556577	0.0749909
SsssN	0.589143	0.578012	-0.575498	-0.00421525
SaasN	0.607661	0.509806	-1.33282	-0.0672277
SdO	0.61485	0.529921	-0.173315	-0.0926524
SssO	0.580446	0.606755	-0.505434	0.0258518
SsF	0.511728	0.517498	-3.18393	0.243007
SssS	0.571916	0.539592	-0.523184	0.0544658
SaaS	0.564144	0.636455	-2.75322	0.0801572
SddssS	0.586818	0.593264	-0.44771	0.00397802
MAXaaCH	0.589937	0.593534	-0.758398	-0.00692707
MAXaasC	0.607238	0.534652	-0.601606	-0.065808
MINaaCH	0.591464	0.580985	-0.964774	-0.0123532
MINaasC	0.580891	0.623768	-0.682917	0.0230419
ECIndex	0.570815	0.542062	-0.930612	0.0569678
ETA_alpha	0.552074	0.529327	-0.718075	0.118949
AETA_alpha	0.60556	0.546738	-0.618215	-0.0602213
ETA_shape_p	0.580244	0.521495	-0.669419	0.0250371
ETA_shape_y	0.535699	0.573279	-1.39626	0.170207
ETA_shape_x	0.501435	0.474411	-1.41669	0.272657
ETA_beta	0.575435	0.540604	-1.38798	0.0418253
AETA_beta	0.563647	0.559982	-0.576654	0.0817391
ETA_beta_s	0.515941	0.607292	-1.45954	0.23057
AETA_beta_s	0.56411	0.603121	-0.765682	0.0798094
ETA_beta_ns	0.568363	0.58174	-0.384079	0.064284
AETA_beta_ns	0.55053	0.56848	-0.89316	0.12401
ETA_beta_ns_d	0.589502	0.584338	-0.9048	-0.00616888
AETA_beta_ns_d	0.578077	0.614542	-0.517456	0.0341357
ETA_eta	0.518561	0.512801	-0.54613	0.220276
AETA_eta	0.476994	0.518926	-1.02486	0.34215
ETA_eta_L	0.554524	0.500982	-0.739826	0.111146
AETA_eta_L	0.557968	0.549512	-1.18846	0.0991768
ETA_eta_R	0.537969	0.506575	-0.554139	0.16286
AETA_eta_R	0.525859	0.467024	-0.923689	0.200427
ETA_eta_RL	0.553326	0.547567	-1.01721	0.113561
AETA_eta_RL	0.513617	0.539041	-0.634327	0.236153
ETA_eta_F	0.540822	0.547159	-1.18148	0.153496
AETA_eta_F	0.564077	0.585653	-1.81198	0.0796835
ETA_eta_FL	0.569093	0.568632	-1.55367	0.0625226
AETA_eta_FL	0.518011	0.566469	-0.392919	0.224091
ETA_eta_B	0.502582	0.490114	-0.191668	0.269234
AETA_eta_B	0.500296	0.517676	-1.19908	0.276376
ETA_eta_BR	0.479119	0.532617	-0.432148	0.33637
AETA_eta_BR	0.473501	0.451682	-0.461932	0.350987
ETA_dAlpha_A	0.579286	0.60818	-0.404055	0.0291576
ETA_dAlpha_B	0.600373	0.558591	-0.379806	-0.0422645
ETA_epsilon_1	0.607204	0.540571	-0.331814	-0.0663196
ETA_epsilon_2	0.59685	0.568218	-0.651997	-0.0318092
ETA_epsilon_3	0.580298	0.590321	-0.688567	0.0262176
ETA_epsilon_4	0.600659	0.568793	-0.835099	-0.0429262
ETA_epsilon_5	0.586541	0.59121	-0.688207	0.00537514
ETA_dEpsilon_A	0.598468	0.565306	-0.474853	-0.0359065
ETA_dEpsilon_B	0.606705	0.546667	-0.463664	-0.0646248
ETA_dEpsilon_C	0.597207	0.564978	-0.649356	-0.0318492
ETA_dBeta	0.594549	0.567348	-0.552969	-0.0222827
AETA_dBeta	0.562593	0.565404	-0.803197	0.0844
ETA_psi_1	0.605369	0.545048	-0.586575	-0.0592297
ETA_dPsi_A	0.602284	0.553243	-0.55388	-0.0489436
ETA_dPsi_B	0.572961	0.532643	-0.469553	0.051135
fragCpx	0.540936	0.47006	-0.881243	0.146043
fMF	0.59456	0.555867	-0.507346	-0.0237644
nHBAcc	0.585562	0.595388	-0.659315	0.00793438
IC0	0.569932	0.586951	-0.667108	0.0606441
IC1	0.561847	0.514031	-0.766623	0.086914
IC2	0.526447	0.525226	-0.877605	0.197487
IC3	0.521422	0.523721	-0.497746	0.213218
IC4	0.533682	0.493904	-0.684139	0.176039
IC5	0.563134	0.512103	-1.16281	0.0827427
TIC0	0.553955	0.506353	-1.06625	0.112267
TIC1	0.537117	0.523869	-0.264008	0.16561
TIC2	0.516966	0.543842	-0.883113	0.226367
TIC3	0.524707	0.521105	-0.963064	0.203076
TIC4	0.537046	0.487053	-0.633166	0.166178
TIC5	0.515792	0.561538	-1.24733	0.230766
SIC0	0.597883	0.566172	-0.417585	-0.0344273
SIC1	0.578312	0.547923	-0.114142	0.0332469
SIC2	0.494826	0.698808	-0.495422	0.2722
SIC3	0.591838	0.545053	-0.841907	-0.014316
SIC4	0.586604	0.581308	-0.343724	0.00524782
SIC5	0.600291	0.56216	-0.424348	-0.0427663
BIC0	0.603619	0.565296	-0.679893	-0.0536087
BIC1	0.603946	0.515189	-0.747726	-0.0547058
BIC2	0.559603	0.562667	-0.510102	0.0943366
BIC3	0.577963	0.556477	-0.443957	0.0331572
BIC4	0.597841	0.550564	-0.584105	-0.0340961
BIC5	0.589338	0.583977	-0.652589	-0.00473423
CIC0	0.566262	0.589457	-0.595934	0.0726404
CIC1	0.59396	0.579964	-0.344646	-0.0205337
CIC2	0.609609	0.533404	-0.687684	-0.0743581
CIC3	0.57189	0.625505	-0.475927	0.0547216
CIC4	0.603586	0.548718	-0.649846	-0.053574
CIC5	0.593546	0.589199	-0.523799	-0.0187449
MIC0	0.568367	0.587422	-0.378252	0.0661133
MIC1	0.549149	0.574171	-0.786203	0.128001
MIC2	0.540226	0.523149	-0.893444	0.156483
MIC3	0.524234	0.500132	-0.50377	0.205695
MIC4	0.512399	0.533624	-1.36791	0.240217
MIC5	0.523967	0.525843	-1.94125	0.205879
ZMIC0	0.572506	0.551572	-1.14398	0.0517206
ZMIC1	0.579894	0.583024	-0.61162	0.0276154
ZMIC2	0.572778	0.625403	-0.798736	0.0510478
ZMIC3	0.60548	0.592471	-0.589708	-0.0595805
ZMIC4	0.59202	0.576523	-1.6913	-0.014478
ZMIC5	0.593783	0.563678	-0.840176	-0.0198381
Kier1	0.548441	0.567872	-1.53805	0.130539
Kier2	0.590854	0.573404	-1.23693	-0.0105911
Kier3	0.593822	0.589672	-0.550246	-0.0196514
FilterItLogS	0.566399	0.514857	-0.788717	0.0709752
VMcGowan	0.532733	0.578917	-0.876744	0.179292
LabuteASA.1	0.539671	0.563528	-0.869057	0.156476
PEOE_VSA1.1	0.601351	0.56811	-1.02256	-0.0458034
PEOE_VSA2.1	0.580258	0.605605	-0.443112	0.0258992
PEOE_VSA3.1	0.590048	0.590401	-0.434138	-0.0069076
PEOE_VSA4.1	0.596936	0.56348	-0.296666	-0.0311247
PEOE_VSA5.1	0.604141	0.562078	-1.03778	-0.0552894
PEOE_VSA6.1	0.594346	0.574697	-0.521748	-0.0218658
PEOE_VSA7.1	0.541221	0.55454	-0.524489	0.151763
PEOE_VSA8.1	0.519144	0.51642	-1.29673	0.219331
PEOE_VSA9.1	0.590898	0.586881	-0.75415	-0.0109077
PEOE_VSA10.1	0.576	0.586205	-0.671104	0.0399378
PEOE_VSA11.1	0.609105	0.539235	-0.244993	-0.072543
PEOE_VSA12.1	0.573441	0.603612	-0.580622	0.048555
PEOE_VSA13.1	0.583103	0.604287	-0.418408	0.0170428
SMR_VSA1.1	0.602621	0.559262	-0.912107	-0.0507587
SMR_VSA2.1	0.57888	0.608706	-0.738178	0.0307278
SMR_VSA3.1	0.58344	0.596979	-0.877724	0.014562
SMR_VSA4.1	0.600942	0.568303	-1.10554	-0.0443464
SMR_VSA5.1	0.503368	0.541751	-0.250657	0.266955
SMR_VSA6.1	0.587554	0.593543	-0.684954	0.00183325
SMR_VSA7.1	0.603552	0.52064	-0.188246	-0.0528648
SMR_VSA9.1	0.56274	0.607793	-0.620051	0.083362
SlogP_VSA1.1	0.602501	0.556599	-0.574259	-0.0499932
SlogP_VSA2.1	0.595988	0.566236	-0.843504	-0.0278052
SlogP_VSA3.1	0.588165	0.588619	-0.661361	5.87215e-05
SlogP_VSA4.1	0.559678	0.554101	-4.47822	0.094093
SlogP_VSA5.1	0.565685	0.555198	-3.60248	0.0750017
SlogP_VSA6.1	0.582114	0.596143	-0.604992	0.0195685
SlogP_VSA8.1	0.575649	0.630151	-0.481143	0.0422556
SlogP_VSA10.1	0.583268	0.562958	-1.76745	0.0153402
SlogP_VSA11.1	0.592109	0.576134	-0.646701	-0.0144516
EState_VSA1.1	0.56059	0.623757	-6.42403	0.0914913
EState_VSA2.1	0.546838	0.569918	-0.839112	0.134657
EState_VSA3.1	0.602845	0.550805	-0.621304	-0.0516925
EState_VSA4.1	0.561081	0.575476	-1.62999	0.0898922
EState_VSA5.1	0.569466	0.596989	-0.930042	0.0617963
EState_VSA6.1	0.592233	0.579845	-0.369131	-0.0139434
EState_VSA7.1	0.567352	0.533179	-1.04539	0.0691751
EState_VSA8.1	0.61236	0.562867	-0.574541	-0.0838496
EState_VSA9.1	0.59139	0.580798	-0.248116	-0.0116389
EState_VSA10.1	0.600132	0.556802	-0.404577	-0.041917
VSA_EState1.1	0.564353	0.553288	-0.758321	0.0783412
VSA_EState2.1	0.590013	0.584114	-0.607885	-0.0069779
VSA_EState3.1	0.576269	0.545933	-0.763772	0.0359024
VSA_EState4.1	0.603148	0.554005	-1.11324	-0.0522649
VSA_EState5.1	0.594755	0.567764	-0.569571	-0.0237232
VSA_EState6.1	0.588623	0.588371	-0.507648	-0.00286191
VSA_EState7.1	0.57149	0.632577	-0.364893	0.0560232
VSA_EState8.1	0.590211	0.520819	-0.835484	-0.00741044
VSA_EState9.1	0.609241	0.534987	-0.346474	-0.0736315
MDEC-22	0.616934	0.530137	-0.785145	-0.100049
MDEC-23	0.598665	0.557465	-0.785545	-0.0367144
MDEC-33	0.60632	0.555211	-0.750179	-0.0629708
MID	0.54946	0.542584	-1.01173	0.123355
AMID	0.589761	0.602851	-1.06679	-0.00643338
MID_h	0.575719	0.581148	-0.454222	0.0398367
AMID_h	0.579596	0.589922	-0.496464	0.0278699
MID_C	0.556104	0.524294	-0.689747	0.10587
AMID_C	0.594123	0.566402	-0.448192	-0.0210844
MID_N	0.544352	0.551727	-1.09042	0.142001
AMID_N	0.586512	0.57329	-1.04327	0.00367817
MID_O	0.583533	0.604612	-0.495869	0.0150769
AMID_O	0.595344	0.574386	-0.708789	-0.0252047
MID_X	0.521312	0.540186	-0.585415	0.214531
AMID_X	0.569234	0.489048	-2.87681	0.0633858
MPC2	0.532909	0.51393	-1.05336	0.177579
MPC3	0.530046	0.4829	-1.41246	0.187376
MPC4	0.51809	0.493921	-1.11586	0.223971
MPC5	0.515785	0.468612	-1.56825	0.230685
MPC6	0.509729	0.483019	-0.465685	0.248715
MPC7	0.511094	0.468857	-0.197087	0.244269
MPC8	0.508684	0.494956	-0.189033	0.251454
MPC9	0.502625	0.504287	-0.348421	0.269832
MPC10	0.463478	0.579645	-0.649917	0.358501
TMPC10	0.49946	0.539641	-0.696586	0.27732
piPC1	0.556281	0.536968	-0.72868	0.104521
piPC2	0.559224	0.5238	-2.60505	0.0960679
piPC3	0.556437	0.523499	-0.760247	0.104745
piPC4	0.543342	0.523238	-0.651548	0.145843
piPC5	0.545201	0.523725	-0.789245	0.140311
piPC6	0.527173	0.554283	-1.16396	0.196165
piPC7	0.530318	0.528784	-0.902623	0.186289
piPC8	0.512083	0.544829	-1.98351	0.241429
piPC9	0.520538	0.514291	-0.467118	0.216148
piPC10	0.514742	0.522304	-0.59339	0.233143
TpiPC10	0.513518	0.522562	-0.732166	0.237641
apol	0.56312	0.551928	-0.752181	0.0814619
bpol	0.558419	0.567014	-0.54253	0.0952255
nRing	0.525284	0.510607	-0.823062	0.200917
n5Ring	0.543266	0.572702	-0.488727	0.146412
n6Ring	0.524365	0.572172	-0.583603	0.204863
n7Ring	0.595313	0.566424	-0.410953	-0.024816
nHRing	0.552666	0.526557	-0.953268	0.116469
n5HRing	0.557146	0.544232	-1.28615	0.101847
n6HRing	0.523726	0.547277	-0.479235	0.206592
n7HRing	0.58542	0.594345	-0.486048	0.00836309
naRing	0.499045	0.645839	-0.820401	0.266367
n5aRing	0.589657	0.575351	-0.809795	-0.00648408
n6aRing	0.570901	0.54602	-0.840249	0.0559719
naHRing	0.59342	0.568369	-0.529116	-0.0184443
n5aHRing	0.60977	0.533416	-0.680425	-0.0746608
n6aHRing	0.575154	0.617109	-0.231983	0.0438404
nARing	0.533073	0.537894	-0.389968	0.178283
n5ARing	0.55842	0.576488	-0.13824	0.0987276
n6ARing	0.537349	0.519037	-5.12528	0.164939
n7ARing	0.582043	0.602421	-0.64551	0.0195297
nAHRing	0.491621	0.537095	-0.585625	0.301088
n5AHRing	0.458378	0.447253	-0.543648	0.392146
n6AHRing	0.521834	0.499655	-2.27502	0.211994
n7AHRing	0.599544	0.567643	-0.586817	-0.0400698
nFRing	0.581032	0.589188	-0.434355	0.0233404
n8FRing	0.600092	0.560157	-0.45545	-0.0417379
n9FRing	0.598505	0.563775	-0.54396	-0.0359012
n10FRing	0.579855	0.558263	-0.594958	0.0269878
n12FRing	0.425131	0.394293	-0.0967576	0.477192
nG12FRing	0.551889	0.567011	-1.05355	0.119269
nFHRing	0.58786	0.565205	-0.442394	-0.000109736
n8FHRing	0.595752	0.569201	-0.4572	-0.0269107
n9FHRing	0.592424	0.580735	-0.344069	-0.0152318
n10FHRing	0.603729	0.55183	-0.473554	-0.0539011
n12FHRing	0.415297	0.409035	-2.55974	0.501197
nG12FHRing	0.580383	0.55101	-1.66495	0.026239
nFaRing	0.600087	0.5583	-0.858539	-0.0418171
n8FaRing	0.610794	0.528947	-0.355238	-0.0782615
n9FaRing	0.590899	0.586593	-0.448682	-0.00998305
n10FaRing	0.587617	0.552709	-0.790961	0.00169461
nG12FaRing	0.590924	0.55579	-0.916778	-0.0103997
nFaHRing	0.60323	0.552981	-0.433855	-0.0525727
n8FaHRing	0.603031	0.550846	-0.513279	-0.0516591
n9FaHRing	0.592206	0.577541	-0.682014	-0.0145609
n10FaHRing	0.587788	0.590392	-0.294616	0.000700532
nG12FaHRing	0.598938	0.56534	-0.482454	-0.0373441
nFARing	0.577876	0.570364	-0.534857	0.0342386
n8FARing	0.583746	0.598186	-0.501458	0.0144369
n9FARing	0.59812	0.575142	-0.818448	-0.0347199
n12FARing	0.415892	0.42161	-0.351536	0.499952
nG12FARing	0.574082	0.587431	-0.50104	0.0468678
nFAHRing	0.562586	0.535067	-0.44808	0.0851317
n8FAHRing	0.601363	0.558173	-0.54903	-0.0454531
n9FAHRing	0.606068	0.551917	-1.39746	-0.0624184
n12FAHRing	0.41475	0.409311	-0.485293	0.502004
nG12FAHRing	0.518927	0.587279	-0.700749	0.221542
nRot	0.606738	0.54461	-0.830805	-0.0650604
RotRatio	0.595595	0.560495	-0.717221	-0.0260551
SLogP	0.540402	0.554274	-0.947072	0.155949
SMR	0.541114	0.578143	-1.1732	0.153217
TopoPSA(NO)	0.591592	0.586644	-0.553857	-0.0125186
TopoPSA	0.592932	0.596441	-0.56866	-0.0165776
GGI1	0.533711	0.528159	-1.619	0.176692
GGI2	0.515084	0.533749	-2.15887	0.231788
GGI3	0.504962	0.500256	-0.947222	0.262594
GGI4	0.502598	0.477463	-1.08063	0.269092
GGI5	0.500481	0.497479	-0.621188	0.275275
GGI6	0.48957	0.466021	-1.40591	0.306332
GGI7	0.473429	0.540527	-0.722595	0.336186
GGI8	0.453242	0.569491	-0.836564	0.382623
GGI9	0.493112	0.477216	-0.288272	0.296671
GGI10	0.491231	0.487758	-0.284933	0.301768
JGI1	0.595653	0.535774	-1.50281	-0.0260309
JGI2	0.543417	0.613229	-0.532632	0.0898156
JGI3	0.573518	0.580901	-1.02209	0.0483735
JGI4	0.55025	0.578879	-1.00015	0.12313
JGI5	0.599984	0.53434	-0.732373	-0.0404314
JGI6	0.5222	0.501114	-1.15286	0.2113
JGI7	0.578575	0.564996	-0.276347	0.0313774
JGI8	0.51088	0.543982	-1.07732	0.244716
JGI9	0.519911	0.525187	-2.67444	0.217839
JGI10	0.537883	0.560669	-1.07486	0.162757
JGT10	0.55888	0.53234	-0.661521	0.0968896
Diameter	0.572728	0.575191	-0.469835	0.0511741
Radius	0.586921	0.578924	-0.602732	0.0036571
TopoShapeIndex	0.549578	0.57718	-0.797496	0.126692
PetitjeanIndex	0.574877	0.516001	-1.0705	0.0442159
Vabc	0.560476	0.559861	-1.14558	0.0911375
VAdjMat	0.560617	0.530853	-0.681002	0.0913771
MWC01	0.543584	0.535902	-0.5492	0.144275
MWC02	0.551018	0.535699	-0.880235	0.121495
MWC03	0.549047	0.535487	-1.08562	0.127645
MWC04	0.539282	0.541264	-1.01982	0.158528
MWC05	0.548882	0.507284	-0.636144	0.12854
MWC06	0.520107	0.562447	-1.30234	0.21765
MWC07	0.506524	0.568188	-0.758525	0.258061
MWC08	0.517528	0.548638	-1.31564	0.224778
MWC09	0.526404	0.525322	-0.634319	0.198178
MWC10	0.545415	0.488345	-1.22727	0.140196
TMWC10	0.54995	0.565577	-0.789744	0.125862
SRW02	0.542657	0.566791	-1.18443	0.148587
SRW04	0.548164	0.548214	-1.12607	0.130688
SRW05	0.544775	0.547871	-0.691551	0.141877
SRW06	0.558129	0.492601	-1.33422	0.0990019
SRW07	0.551531	0.543585	-1.00964	0.120771
SRW08	0.53103	0.536613	-0.921604	0.183942
SRW09	0.554645	0.552705	-0.90115	0.110068
SRW10	0.54833	0.514774	-0.750089	0.130733
TSRW10	0.544112	0.523616	-0.645239	0.142574
MW.1	0.522271	0.585732	-1.94774	0.211321
AMW	0.599696	0.560382	-0.785461	-0.0405492
WPath	0.593437	0.527483	-0.61059	-0.0196738
WPol	0.538891	0.475128	-0.889653	0.160071
Zagreb1	0.54129	0.518695	-0.880422	0.152161
Zagreb2	0.535927	0.504055	-0.637602	0.168803
mZagreb1	0.530898	0.541014	-1.23541	0.184906
mZagreb2	0.566631	0.550128	-0.983195	0.0710093
